1 A 'phenotypic hangover' – the predictive adaptive response and multigenerational effects of

2 altered nutrition on the transcriptome of *Drosophila melanogaster*

3

4 Amy J. Osborne<sup>1,\*</sup> and Peter K. Dearden<sup>1</sup>

5

6 1 Department of Biochemistry, University of Otago, Dunedin, New Zealand

7 \* Corresponding author

8

9 amy.osborne@otago.ac.nz, peter.dearden@otago.ac.nz

10

11

12

13

14

15

16

17

18

19

20

21

22

23

24

25

26

27 **Abstract**

28 The Developmental Origins of Health and Disease (DOHaD) hypothesis predicts that early-  
29 life environmental exposures can be detrimental to later-life health, and that mismatch  
30 between the pre- and postnatal environment may contribute to the growing non-  
31 communicable disease (NCD) epidemic. Within this is an increasingly recognised role for  
32 epigenetic mechanisms; epigenetic modifications can be influenced by, e.g., nutrition, and  
33 can alter gene expression in mothers and offspring. Currently, there are no whole-genome  
34 transcriptional studies of response to nutritional alteration. Thus, we sought to explore how  
35 nutrition affects the expression of genes involved in epigenetic processes in *Drosophila*  
36 *melanogaster*. We manipulated *Drosophila* food macronutrient composition at the F0  
37 generation, mismatched F1 offspring back to a standard diet, and analysed the  
38 transcriptome of the F0 – F3 generations by RNA-sequencing. At F0, the altered (high  
39 protein, low carbohydrate, HPLC) diet increased expression of genes involved in epigenetic  
40 processes, with coordinated downregulation of genes involved in immunity,  
41 neurotransmission and neurodevelopment, oxidative stress and metabolism. Upon reversion  
42 to standard nutrition, mismatched F1 and F2 generations displayed multigenerational  
43 inheritance of altered gene expression. By the F3 generation, gene expression had reverted  
44 to F0 (matched) levels. These nutritionally-induced gene expression changes demonstrate  
45 that dietary alteration can upregulate epigenetic genes, which may influence the expression  
46 of genes with broad biological functions. Further, the multigenerational inheritance of the  
47 gene expression changes in F1 and F2 mismatched generations suggests a predictive  
48 adaptive response (PAR) to maternal nutrition. Our findings may help to understand the

49 interaction between maternal diet and future offspring health, and have direct implications

50 for the current NCD epidemic.

51

52 **Background**

53

54 Exposure to aberrant or harmful environments during development and early life can be  
55 detrimental to later life health. From these observations is derived the Developmental  
56 Origins of Health and Disease (DOHaD) hypothesis (Barker, 2007, Gluckman and Hanson,  
57 2004a, Gluckman et al., 2010, Bruce and Hanson, 2010), which seeks to explain why the  
58 period from conception to birth and the first few years of life is critical for determining life-  
59 long susceptibility to non-communicable diseases (NCDs). Many NCD phenotypes are  
60 thought to be caused by developmental perturbations that are a consequence of altered  
61 epigenetic marks (Gluckman and Hanson, 2004a, Heindel, 2006), induced by environmental  
62 exposure during critical periods of development (Skinner et al., 2013). Alteration to the  
63 epigenome regulates gene expression through DNA methylation, histone and chromatin  
64 modifications (Callinan and Feinberg, 2006, Peaston and Whitelaw, 2006), providing plasticity  
65 to the genome. Consequently, phenotypes under epigenetic regulation provide a pathway  
66 through which the genome can interact with the environment (Holliday and Pugh, 1975). If  
67 the epigenetic modifications occur at a time during which they are able to affect the  
68 germline, such modifications may also influence development of the offspring (Skinner et al.,  
69 2013).

70

71 The interaction between the environment and the epigenome and the resulting phenotypic  
72 adaptations, coupled with the growing NCD epidemic, led to the predictive adaptive  
73 response (PAR) hypothesis (Gluckman and Hanson, 2004b). This hypothesis states that  
74 nature of the predictive adaptive response (PAR) is determined by the degree of mismatch  
75 between the pre- and postnatal environments. This mismatch results from the information

76 that the fetus receives on environmental conditions while *in utero*, to which it will respond  
77 adaptively by programming its biology to expect that environment. If the actual postnatal  
78 environment matches the prenatal prediction, then the PARs are appropriate and disease risk  
79 is low; if they do not match then the PAR is inappropriate, and disease risk is increased. For  
80 instance, obesity has a distinct epigenetic profile. This pattern could be established in early  
81 life as a response to the maternal, fetal and/or early postnatal environment, and later-life  
82 nutritional mismatch could mean that the individual has been programmed inappropriately,  
83 leading to an increased risk of obesity and associated diseases later in life (Cordero et al.,  
84 2015). This implies that the epigenetic hallmarks of early life exposures may be able to be  
85 maintained or 'stored' in such a way as to produce long-lasting effects (Lee, 2015).

86

87 Along with stress, drugs and environmental toxicants, one of the main factors that can cause  
88 epigenetic perturbation is nutrition; evidence suggests that early-life nutrition can not only  
89 affect the long-term health of the individual, but also of their offspring (Tarry-Adkins and  
90 Ozanne, 2011, Langley-Evans, 2015, Lillycrop and Burdge, 2015) potentially through  
91 epigenetic mechanisms (Aiken and Ozanne, 2013, Haggarty, 2013, Vickers, 2014a, Vickers,  
92 2014b, Vaiserman, 2014). Consistent with the DOHaD hypothesis, strong links exist between  
93 both maternal and early life nutrition and cardiovascular disease (Barker, 1997), diabetes and  
94 obesity (Uauy et al., 2011) along with asthma and allergy, autoimmune disease, cancer and  
95 mental health (Gluckman et al., 2011, Barouki et al., 2012, Hanson and Gluckman, 2015,  
96 Balbus et al., 2013). Inappropriate maternal nutrition has been linked to incorrect epigenetic  
97 'priming' during fetal or postnatal life (Burdge et al., 2007b, Brudasca and Cucuianu, 2016); in  
98 particular, diets high in carbohydrate content (sugar) have been shown to program  
99 metabolic status and diabetes (Buescher et al., 2013, Musselman et al., 2011).

100

101 Many nutrition-related phenotypes have been attributed to changes in epigenetic processes  
102 and a classic example of this is that of methyl supplementation, which influences coat colour  
103 in agouti mice (Waterland and Jirtle, 2003). Nutrition influences are separated into direct  
104 effects and also indirect (offspring) effects. Direct effects can be exemplified by high-fat  
105 diets inducing obesity and metabolic syndrome, due to the methylation pattern of particular  
106 genes and promoters such as leptin (Milagro et al., 2009) and PPAR $\gamma$  (Fujiki et al., 2009), and  
107 the differential DNA methylation detected in metabolic syndrome in both humans and  
108 rodents (Luttmer et al., 2013, Sánchez et al., 2015). Indirect effects on offspring metabolic  
109 phenotype can occur via maternal diet. For example, high fat diets in utero are known to  
110 affect offspring epigenetic patterns and methylation status of particular genes, for example,  
111 adiponectin and leptin genes (Masuyama et al., 2016), while a high fat diet during pregnancy  
112 and lactation can induce epigenetic modifications and differential expression of the  $\mu$ -opioid  
113 receptor, and corresponding hypomethylation of the promoter regions of the gene, in  
114 mouse offspring (Vucetic et al., 2010). Additionally, maternal protein restriction can cause  
115 hypomethylation of particular genes involved in metabolic processes in fetus and offspring  
116 (Lillycrop et al., 2007, Burdge et al., 2007a, van Straten et al., 2010, Burdge et al., 2004) and  
117 can also affect methylation in the developing placenta (Reamon-Buettner et al., 2014). Such  
118 epigenetic perturbation is not just limited to fetal and early life; the postnatal period is also  
119 susceptible to the epigenetic effects of nutrition. For example, hypermethylation of the pro-  
120 opiomelanocortin promoter occurs in over-fed rats (Plagemann et al., 2009), and postnatal  
121 folic acid supplementation can lead to hypermethylation of PPAR $\alpha$  (Burdge et al., 2009). This  
122 sensitivity of the epigenome to the effects of the environment (nutrition) also extends into

123 adulthood, where epigenetic changes have been observed in response to nutritional changes  
124 (Christman et al., 1993, Waterland et al., 2006, Hoile et al., 2013).

125

126 In addition to metabolic genes, altered nutrition appears to have broader genomic  
127 consequences. For instance, nutrition can also alter markers of inflammation and oxidative  
128 stress (Jacometo et al., 2015); a protein restricted diet in pregnancy leads to an increased  
129 susceptibility to oxidative stress in offspring (Langley et al., 1994), while a high carbohydrate  
130 diet increases the oxidative stress response (Gregersen et al., 2012). A high fat, high  
131 carbohydrate meal can induce oxidative and inflammatory stress as reflected by increased  
132 reactive oxygen species (ROS) generation in both normal weight (Aljada et al., 2004) and in  
133 obese people (Patel et al., 2007), suggesting that oxidative stress and inflammation are major  
134 mechanisms involved in metabolic disorders associated with obesity (Fernández-Sánchez et  
135 al., 2011) and can also induce epigenetic changes (Sánchez et al., 2015). Indeed, the stress  
136 response is well established to be under epigenetic control in humans (Cencioni et al., 2013).  
137 In plants, DNA and histone modifications control gene expression when a plant is under  
138 environmental stress (Chinnusamy and Zhu, 2009). In terms of applicability to health, we  
139 know that low doses of reactive oxygen species, from calorie restricted or high carbohydrate  
140 diets, promote health and life span (Ristow and Schmeisser, 2011). Thus considering the  
141 above, along with the PAR hypothesis, it is likely that such biological responses to nutrition  
142 reflect the idea that induced epigenetic changes that underpin physiological change, and aid  
143 in the adaptation of an individual, and potentially its offspring, to an adverse environment  
144 (Gluckman et al., 2005).

145

146 Nutritional deficiency may also lead to the development of psychopathological behaviour  
147 such as antisocial, violent and criminal behaviour (Neugebauer et al., 1999). This may in part  
148 be a consequence of the capacity of nutritional deficiency to alter brain development (Liu  
149 and Raine, 2006), possibly through epigenetic factors, which may lead to changes in brain  
150 structure and function (Liu et al., 2015). Supporting this is the suggestion that macronutrient  
151 deficiency can cause changes in epigenetic regulation, which can lead to impaired brain  
152 development, signalling molecule imbalance, neurotoxicity and differences in  
153 neurotransmission (Liu et al., 2015) which all contribute to psychopathological outcomes.  
154 For example, studies into participants from the Dutch Hunger Winter cohort found  
155 correlations between prenatal famine exposure and schizophrenia (Susser and Lin, 1992,  
156 Susser et al., 1996), along with persistent epigenetic changes at, e.g. the *IGF1* gene (Heijmans  
157 et al., 2008).

158

159 Thus, considering that gene-specific studies of altered nutrition have demonstrated broad  
160 and diverse genetic and epigenetic consequences, it is pertinent to apply this concept to the  
161 whole genome. Nutrition is commonly investigated as an environmental factor that is  
162 expected to influence the epigenetic landscape, and there are several examples in the  
163 literature of response to altered nutrition being 'inherited' multigenerationally (Burdge et al.,  
164 2007b, Jirtle and Skinner, 2007, Carter et al., 2004, Golding, 2004) and transgenerationally (F3  
165 and beyond, (Waterland and Jirtle, 2003)). As such, altered gene expression, via epigenetic  
166 marks in response to nutrition, coupled with the PAR hypothesis, could be the key to  
167 understanding the prevalence of obesity and metabolic syndrome. Here we explore the PAR  
168 hypothesis and the ability of nutrition to affect gene expression at a whole-genome level by  
169 manipulating the diet of the fruitfly, *Drosophila melanogaster*, to investigate the extent to



170 which gene expression is changed by differing levels of macronutrients. Previous research  
171 has shown that a high-sugar maternal diet can alter the body composition of larval  
172 *Drosophila* offspring for at least two generations (Buescher et al., 2013), as well as  
173 demonstrating that nutrition is able to influence traits relative to metabolic syndrome,  
174 longevity and the immune response (Musselman et al., 2011, Morgan, 2012, Roussou et al.,  
175 2016). Considering such traits and responses are often under epigenetic control, we predict  
176 that dietary manipulation will have broad consequences for the expression of genes involved  
177 in epigenetic processes.

178

179

## 180 **Methods**

181

### 182 **Fly husbandry**

183

184 *Drosophila melanogaster* stocks used in this study were wild-type Canton-S flies from the  
185 Bloomington Drosophila Stock Center at Indiana University. *Drosophila* were cultured in a  
186 dedicated invertebrate laboratory using standard techniques. Briefly, flies were maintained  
187 in laboratory incubators at 25C in a P Selecta HOTCOLD-C incubator. Larvae were reared on  
188 either a standard low protein high carbohydrate (LPHC, standard laboratory fly food) or a  
189 high protein low carbohydrate (HPLC) diet. These differential diets consisted of standard  
190 brewer's yeast (Health2000, NZ), sugar (New Zealand Sugar Company, Auckland, New  
191 Zealand) and cornmeal (Health2000, NZ), in varying ratios (Table 1). Agar (A7002, Sigma-  
192 Aldrich, MO, USA), propionic acid (Thermo Fisher, New Zealand, AJA693) and Nipagin  
193 (47889, Sigma-Aldrich, MO, USA, 10% w/v in 100% ethanol) were added in equal amounts.

194 Gross energy (KJ/g) of both the LPHC and HPLC food types was determined by bomb  
195 calorimetry, and total protein content (%) was calculated using the total combustion method  
196 (Table 1) by the Institute of Food, Nutrition and Human Health at Massey University,  
197 Palmerston North, New Zealand.

198

## 199 **Nutrition experiments**

200

201 *Drosophila* were manipulated under anaesthesia (CO<sub>2</sub>) and initially raised on LPHC (low  
202 protein, high carbohydrate, standard fly) food. To enable mating, 50 female flies were  
203 segregated within 4 hours of eclosion, and incubated with 10-15 male flies, on LPHC food,  
204 for 24 hours. Female flies were separated and incubated on either LPHC or HPLC diet.  
205 Female flies laid eggs in their specified food and the F1 offspring from the HPLC diet were  
206 either maintained on HPLC, or mismatched onto LPHC diet (Figure 1). The further offspring  
207 then remained on those matched or mismatched diets, relative to the F0 generation. Thus  
208 the biological mismatch relates to flies from a HPLC (non-standard) dietary background that  
209 are mismatched onto a LPHC background.

210

211 At each generation, RNA was extracted from female *Drosophila* using a modified kit protocol.  
212 Firstly, 10 female *Drosophila* were ground in 300ml of Trizol reagent (Invitrogen) that had  
213 been cooled on dry ice, with a disposable, sterile pestle until homogenised. A further 200µl  
214 of Trizol was added and the homogenised tissue was incubated in Trizol reagent for 5 min.  
215 200 µl of Chloroform was added and the solution was vigorously mixed via vortex for 15  
216 seconds. This solution was incubated on ice for 5 min and centrifuged at 12,000 g at 4°C for  
217 10 min to separate the aqueous (containing RNA) and organic phases. The aqueous solution

218 was removed and added to an equal volume of 70% ethanol and mixed via pipetting. The  
219 Qiagen RNeasy Kit (Qiagen, Hilden, Germany) was then used to purify the RNA, according to  
220 the manufacturer's instructions. RNA was stored at -80°C until needed.

221

## 222 **Transcriptomic experiments**

223

224 Two F0 generation replicates from each of the LPHC and HPLC diets and two replicates from  
225 the F1, F2 and F3 generations with matched and mismatched diets were prepared (boxed  
226 numbers, Figure 1), resulting in 16 total RNA samples submitted to the Otago Genomics and  
227 Bioinformatics Facility at the University of Otago (Dunedin, New Zealand) under contract to  
228 the New Zealand Genomics Limited for library construction and sequencing. The libraries  
229 were prepared using TruSeq stranded mRNA sample preparation kit according to the  
230 manufacturer's protocol (Illumina). All libraries were normalised, pooled and pair-end  
231 sequenced on 2 lanes of high-output flowcell HiSeq 2500, V3 chemistry (Illumina),  
232 generating 100-bp reads. Libraries had an average insert size of ~208bp.

233

234 Transcriptomic output was analysed in CLC Genomics Workbench Version 8.5.1. Reads were  
235 aligned to the *Drosophila melanogaster* reference genome (BDGP6) as implemented in CLC  
236 Genomics Workbench, and differential gene expression (EDGE test) was calculated between  
237 samples using an absolute fold change value of >1.5, and an FDR-corrected p-value of  
238 <0.001. Transcriptomic data was validated by Nanostring: samples were submitted to the  
239 Otago Genomics and Bioinformatics Facility at the University of Otago (Dunedin, New  
240 Zealand) under contract to the New Zealand Genomics Limited for nCounter Custom Gene  
241 Expression assays (Nanostring). 100ng total RNA in 5uL total volume was processed using

242 the standard nCounter XT Total RNA protocol. The Total RNA and the CodeSet were  
243 combined with hybridisation buffer and incubated at 65C for 20 hours. The Codeset consists  
244 of Reporter and Capture probes that hybridise the target sequence of interest, forming a  
245 tripartite complex. Hybridised samples were then processed in batches of 12 using the High  
246 Sensitivity Protocol (3 hours). Raw data was exported and QC-checked using Nanostring's  
247 nSolver data analysis tool ([www.nanostring.com](http://www.nanostring.com)). As per the Nanostring CodeSet design  
248 criteria, 25 candidate genes for validation were chosen, including two housekeeping genes  
249 incorporated (Mnf and Rpl32, Table 2). Raw data was normalised to the geometric mean of  
250 both the positive controls (included in the hybridisation steps) and the nominated  
251 housekeeping genes. Normalised Nanostring data was compared to transcriptomic data and  
252 the Pearson's correlation coefficient was calculated in R (Team, 2008).

253

#### 254 **Gene ontology (GO) analyses**

255

256 Functional annotation clustering (FAC) was undertaken in the Database for Annotation,  
257 Visualization and Integration of Discovery (DAVID) v6.8 (Huang et al., 2009b, Huang et al.,  
258 2009a) with the following categories: COG\_ONTOLOGY, GOTERM\_BP\_DIRECT,  
259 GOTERM\_CC\_DIRECT, GOTERM\_MF\_DIRECT, KEGG\_PATHWAY and INTERPRO. Up- and  
260 down-regulated genes from the F0 generation were submitted separately to DAVID for FAC,  
261 and analysed against a background of genes that were expressed and detectable in this  
262 dataset, to identify GO terms that were significantly enriched between the HPLC and LPHC F0  
263 generation.

264

#### 265 **Statistical analyses**

266 Significant differences in mean gene expression between different dietary conditions and  
267 generations was calculated via ANOVA and Tukey's posthoc testing, as implemented in R  
268 (Team, 2008).

269

## 270 **Results**

271

### 272 **RNAseq data**

273 Summary statistics for transcriptomic work is shown in Supplementary file 1. Briefly, each  
274 sample yielded between 3164 Mbases and 4286 Mbases (average 4001 Mbases), with an  
275 average number of reads of 32,006,648 reads (range 25,310,758 – 34,288,584 reads). The  
276 mean quality score was an average of 36 PF (range 35.4 – 35.72 PF).

277

### 278 **Differential gene expression**

279 Of 17,490 genes annotated in the Drosophila genome and contained within the CLC  
280 reference database, 12,424 were expressed and detected in these transcriptomic  
281 experiments. Of these 12,424 genes, 2946 were differentially expressed (1074 [8.6%] down-  
282 regulated and 1872 [15.1%] up-regulated (Supplementary file 2), with an absolute fold  
283 change of >1.5, and an FDR-corrected p-value of <0.001, as determined by EDGE test as  
284 implemented in CLC.

285

### 286 **Gene ontology**

287 DAVID uses a clustering approach to reduce redundancy; GO terms that are similar, are  
288 clustered together. Each term within the cluster is given a p-value, and the cluster itself is

289 given an enrichment score (the geometric mean in  $-\log$  scale of the individual GO term p-  
290 values). An enrichment score of 1.3 is equivalent to a non-log p-value of 0.05.

291

292 Functional annotation clustering of genes that are up-regulated in HPLC vs. LPHC indicated  
293 that the dataset was highly enriched for genes that are involved in epigenetic processes such  
294 as chromatin binding (ES 10.64), DNA replication (enrichment score, ES, 4.64), chromatin  
295 regulation (ES 1.62) and histone binding and phosphorylation (ES 1.60) (Table 3). Conversely,  
296 clustering of genes that are downregulated in HPLC vs. LPHC indicated that the dataset was  
297 highly enriched for genes that are involved in immunity (ES 11.41), fatty acid metabolism (ES  
298 3.49), neurotransmission (ES 3.35) cellular metabolic processes (ES 2.49) and oxidative stress  
299 pathways (ES 2.19, Table 4).

300

### 301 **Validation:**

302 Based on the genes that were upregulated in this study, we selected a panel for 20 genes for  
303 transcriptomic data validation. All transcriptomic samples were validated by Nanostring,  
304 per-sample  $r$  value of 0.81-0.95, whole dataset correlation  $r$  of 0.86 (Supplementary file 3).

305

### 306 **Multigenerational gene expression of genes of interest:**

307

308 To determine whether the pattern of gene expression that we identify as being altered in  
309 response to diet is maintained across generations (F0-F3, matched [M] and mismatched  
310 [MM]) when the HPLC diet is removed, we analysed the multigenerational expression levels  
311 of particular epigenetic genes of interest that were identified as being upregulated in HPLC.  
312 From the lists of clustered genes generated by DAVID, the same pattern of expression was

313 observed for every gene, which showed the intermediate-level maintenance of the  
314 upregulation of the genes in the F1 and F2 generation, followed by a reversion to F0  
315 (matched) gene expression levels by the F3 generation. Figure 2 displays a selection of  
316 indicative graphs which display this effect, with ANOVA significance data listed in Table 3  
317 (described in Supplementary file 4) and significant pairwise comparisons as determined by  
318 Tukey's posthoc testing (Supplementary file 5) indicated by solid and dashed lines. There is  
319 no significant difference between the expression of epigenetic genes when comparing the F0  
320 LPHC diet and the F3MM flies, despite an intermediate and significant difference between F1  
321 and F2 flies mismatched onto LPHC diets.

322

323 When we consider genes that were significantly downregulated between the F0 flies, we see  
324 the same pattern of gene expression, in the opposite direction. Choosing to look at genes  
325 that are clustered using DAVID (Table 4) we see that genes that are downregulated in  
326 response to diet, remain at a low level in the F1 and F2 mismatched cohorts (F1MM and  
327 F2MM) but by F3, their gene expression has regained the same level as the LPHC (F0)  
328 generation, despite being lower in the F1 and F2 generations (Figure 3 and Supplementary  
329 files 4 and 6). This effect is genome-wide, and applies to every gene tested from the lists  
330 generated by DAVID.

331

## 332 **Discussion**

333

334 The primary goal of this study was to investigate the effect of nutrition on the expression of  
335 genes involved in epigenetic processes. We have demonstrated that a high protein, low  
336 carbohydrate (HPLC) diet results in genome-wide upregulation of epigenetic genes in the F0

337 generation, compared to that observed in a standard *Drosophila* low protein, high  
338 carbohydrate (LPHC) diet; this effect was so strong that the overwhelming majority of genes  
339 that were upregulated in response to diet were involved in epigenetic processes, with very  
340 few other classes of genes categorised as significantly upregulated. Classes of genes that  
341 were downregulated in response to the HPLC diet, versus LPHC, were broader in scope, and  
342 included genes involved in the immune response, cell signalling, oxidative stress,  
343 carbohydrate and fatty acid metabolism, and neurotransmission. Thus, this study shows that  
344 altering a LPHC diet to a HPLC results in genome-wide upregulation of genes involved in  
345 epigenetic processes, with a coordinated down regulation of genes with broad physiological  
346 functions. The coordinated nature of the gene expression data we observed imply, firstly,  
347 that genes involved in the processes of neurotransmission, oxidative stress, metabolism and  
348 immunity appear to be under epigenetic control, and secondly, that this epigenetic control,  
349 and altered biological response, is influenced by nutrition.

350

351 In response to the genomic and epigenomic changes observed in the F0 generation, we  
352 further questioned if dietary alteration resulted in developmental programming of the  
353 biological response to diet; specifically, whether the changes induced by the HPLC diet in the  
354 F0 generation persisted beyond F0, upon removal of the HPLC diet. The genomic changes  
355 induced in the F0 generation persisted at intermediate levels in mismatched F1 and F2  
356 generations, in the absence of the HPLC diet. By the F3 generation, gene expression in the  
357 mismatched flies had reverted back to the level observed in the F0 matched generation. We  
358 hypothesise, firstly, that this multigenerational inheritance of gene expression, followed by a  
359 reversion to matched F0 levels by the time the F3 generation is reached, indicates moderate  
360 epigenetic programming in the form of a predictive adaptive response (PAR). We further



361 hypothesise that the 'correction' of the genomic changes induced by dietary alteration after  
362 three generations implies that dietary reversion to match the F0 generation may be able to  
363 correct an altered genomic landscape, effectively rescuing an aberrant nutrition-induced  
364 phenotype.

365

366 The environment is able to interact with genes through epigenetic mechanisms (Holliday and  
367 Pugh, 1975) particularly during development (Gluckman and Hanson, 2004a, Gluckman et al.,  
368 2010, Bruce and Hanson, 2010); it is during development, when DNA is replicating at an  
369 accelerated rate, that the genome is most sensitive to environmental influences that could  
370 induce epigenetic alteration, which may influence gene expression and the development of  
371 the animal. Crucially, this could also lead to the alteration of the epigenome of the germ  
372 cells (Skinner et al., 2013). Any permanent alteration to the germ cell epigenome (Guerrero-  
373 Bosagna et al., 2010) may then be transmitted through the germ line, with adverse  
374 phenotypic consequences for offspring (Barker, 2007, Skinner, 2011). For example, adult-  
375 onset diseases can be induced through embryonic exposure to environmental toxins,  
376 primarily endocrine disruptors (Anway et al., 2006, Newbold et al., 2006, Heindel, 2006,  
377 Anway and Skinner, 2006). Thus, if epigenetic modifications do become permanent, these  
378 modifications can be inherited by future generations and impact disease susceptibility  
379 (Anway et al., 2005, Jirtle and Skinner, 2007).

380

381 A large number of studies report transgenerational inheritance in a range of eukaryotes  
382 (reviewed in (Jablonka and Raz, 2009)). Many of these studies, particularly in mammals,  
383 report inheritance of the acquired trait over two or three generations. Concordant with work  
384 by Jirtle and Skinner (2007), we agree that these effects should not be defined as truly

385 transgenerational, because, mechanistically, exposure of an F0 gestating female to an  
386 environmental stimulus (nutrition, toxicants, stress) also exposes the F1 embryo (Figure 1,  
387 (Osborne et al., 2013)). Further, for species that develop *in utero*, parental exposure also  
388 exposes the germ cells that will form the F2 generation. Thus traits present in the F2  
389 generation should be considered as multigenerational, rather than transgenerational, as they  
390 could have been induced by direct environmental exposure through the fetus and the germ  
391 line. To reflect this, some studies searching for evidence of true transgenerational  
392 inheritance are declining to assay the F1 generation entirely (Xia et al., 2016) due to the fact  
393 that transmission to the F1 generation can be indicative of both parental effects and  
394 programming (Xia and de Belle, 2016). Thus, here we describe our findings from the F1 and  
395 F2 generations as multigenerational inheritance, since the gene expression changes induced  
396 by the environment in the parental generation revert to F0 levels after the F2 generation.

397

398 The current NCD epidemic is etiologically very complex but it is thought to be mediated, in  
399 part, by developmental aberrations arising from the inheritance of altered epigenetic marks  
400 (Gluckman and Hanson, 2004a, Heindel, 2006). Many metabolic phenotypes and gene  
401 expression differences are linked to differential epigenetic marks that are nutritionally-  
402 induced. For example, a protein-restricted diet during pregnancy causes hypomethylation of  
403 the hepatic PPAR $\alpha$  (peroxisome proliferator-activated receptor alpha) and glucocorticoid  
404 receptor (GR) genes in rats, and promotes the same hypomethylation in the F1 and F2  
405 offspring of F0 rats fed a protein-restricted diet during pregnancy, despite the nutritional  
406 challenge being only in the F0 generation (Burdge et al., 2007b). Others have reported  
407 evidence of embryonic environmental exposure influencing the phenotype of the F1  
408 generation (Carter et al., 2004, Golding and Team, 2004, Kang et al., 2002, Klip et al., 2002,

409 Portha, 2005, Tsui and Wang, 2004), as well as, specifically, maternal nutrition exerting effects  
410 on the F1 phenotype (Carter et al., 2004, Golding and Team, 2004). Such research strongly  
411 implies that epigenetic effects could be the key to understanding the current epidemic of  
412 overweight and obese, and associated metabolic syndromes, particularly if nutrition in the F0  
413 generation can induce a PAR to nutrition, as we hypothesise is occurring here. Interestingly,  
414 comprehensive studies using animal models that investigated the effect of both protein  
415 restricted and energy-rich diets during pregnancy on the phenotype of the offspring showed  
416 that offspring born to dams fed these different diets exhibited persistent metabolic changes,  
417 similar to those observed in human metabolic disease such as obesity, insulin resistance and  
418 hypertension (Lillicrop and Burdge, 2015), indicating an element of developmental  
419 programming and a possible PAR. These findings imply that both famine (protein  
420 restriction) and energy-rich diets, when mismatched back to adequate nutrition, are similarly  
421 detrimental to the metabolic health of offspring, and that it is possibly the mismatch itself  
422 between inadequate nutrition and proper nutrition which is leading to metabolic disease  
423 phenotypes. This highlights the fact that epigenetic mechanisms play a highly complex role  
424 in obesity and metabolic pathways (Xue and Ideraabdullah, 2016, Lillicrop and Burdge, 2011,  
425 Lillicrop and Burdge, 2015, Li et al., 2010).

426

427 In addition to the striking expression level changes observed in genes involved in epigenetic  
428 processes, one major source of change that we observed in these data are genes involved in  
429 oxidative stress. Malnutrition or excess of particular nutrients can cause oxidative damage  
430 (Fang et al., 2002). For example, hyperglycaemia, which is an excess of sugar in the blood  
431 and one of the hallmarks of diabetes, is linked to a diet that is rich in carbohydrates and fat  
432 (Gupta et al., 2013, Yang et al., 2012). A build-up of sugar can lead to tissue damage, and

433 this can be maintained because of metabolic memory (Sánchez et al., 2015), which itself may  
434 induce epigenetic changes and altered gene expression (Ceriello, 2010, El-Osta et al., 2008,  
435 Sánchez et al., 2015). Given that increased carbohydrate intake can induce oxidative stress as  
436 reflected by increased reactive oxygen species (ROS) generation (Aljada et al., 2004, Patel et  
437 al., 2007), our results are consistent with the observation that high carbohydrate diets are  
438 implicated in increased oxidative and metabolic stress (e.g. (Langley et al., 1994), and that the  
439 genome may be responding adaptively to dietary stressors. We know that oxidative stress  
440 responses are often under epigenetic control (Cencioni et al., 2013), and also, that maternal  
441 nutritional deficiency in pregnancy can lead to altered methylation and increased oxidative  
442 DNA damage in the brains of adult offspring (Langie et al., 2013), which, as well as being  
443 directly influenced by nutrition, may predispose to neurological disorders in later life.

444

445 Consistent with, and leading on from this observation, these data display a decrease in the  
446 expression of genes involved in neurotransmission and neurodevelopment when exposed to  
447 a HPLC diet. There is strong evidence linking oxidative stress to neurodegeneration and  
448 neurodegenerative disease, such as Alzheimer's disease (Tabaton and Tamagno, 2007). In  
449 addition, it is also clear that an increase the production of ROS, induced by environmental  
450 factors, can increase risk of a multitude of neurodegenerative diseases (Migliore and  
451 Coppedè, 2009). Thus, it stands to reason that, in these data, nutrition may be impacting on  
452 the production of ROS and the expression of genes involved in ROS pathways and those  
453 involved in neurotransmission and neurodegeneration.

454

455 In addition to the DOHaD hypothesis, there are also free radical early life theories, which link  
456 environmental agents (e.g. diet, heavy metals) with perturbations of gene regulation and

457 expression (in, for example, the *APP* gene), and the onset of, e.g., Alzheimer's disease (Lahiri  
458 et al., 2007). Free radical early life theories also link the necessity for oxygen in histone  
459 demethylase action to epigenetic processes in development (Hitchler and Domann, 2007).  
460 These theories are supported by the observation that nutrition during pregnancy can induce  
461 epigenetic changes that result in altered nervous system development (McGowan et al.,  
462 2008) and also offspring cerebral function (Gallagher et al., 2005). Further, nutrient  
463 availability during the pre and postnatal periods can lead to long-lasting changes in neuron  
464 development (Niculescu et al., 2004), as well as influence the development of  
465 psychopathological behaviour (Neugebauer et al., 1999). This is because nutritional deficit  
466 may lead to altered brain development (Liu and Raine, 2006), possibly via epigenetic factors  
467 that can lead to changes in brain structure and function (Liu et al., 2015). Given that  
468 micronutrient availability can heavily influence neurotransmission, due to the fact that the  
469 function of the brain is inherently related to its metabolism of nutrients (Liu et al., 2015) in  
470 the form of vitamins and minerals that function as co-enzymes in neurotransmission and  
471 neurotransmitter metabolism, our gene expression data are supportive of these linkages.  
472  
473 Thus, through our data, we hypothesise that the genome-wide changes we observe in genes  
474 involved in epigenetic pathways could be responsible for the gene expression changes in  
475 other, broad, biological process seen in response to diet. The intermediate maintenance of  
476 these gene expression changes, even when the HPLC diet is removed, suggests a PAR to diet;  
477 the biology of the mismatched flies is programmed to expect a certain type of diet, and is  
478 responding adaptively, with altered gene expression in the absence of HPLC, albeit at a  
479 slightly lower level. The complete reversion of this in the F3 generation suggests an element  
480 of phenotypic rescue, implying that altered nutrition did not affect the germline, and that the

481 gene expression changes are not fixed transgenerationally, and thus may have the capacity  
482 to be corrected over time.

483

484 To date, there have been no genome-wide assessments of the effect of nutrition on total  
485 gene expression. This study contributes to our understanding of the myriad ways in which  
486 nutrition can influence gene expression, phenotypes and future health outcomes, with  
487 relevance to the DOHaD hypothesis and the current NCD epidemic. While our study  
488 demonstrates multigenerational inheritance of gene expression values, rather than  
489 transgenerational, it is worth noting that the phenotypic effects of gene expression changes,  
490 rather than the gene expression itself, can persist and show multigenerational, and  
491 potentially transgenerational, inheritance. For example, a low protein diet given to  
492 *Drosophila* can increase H3K27me3 through upregulation of the E(z) protein. Interestingly,  
493 while the upregulation of the (E)z protein was not detected in the F2 generation, the  
494 associated increase in methylation H3K27me3 was in fact detected in the F2 generation (Xia  
495 et al., 2016) and the coordinated effect on longevity was also present through to the F2  
496 generation. This suggests that while the gene expression and protein level is not inherited  
497 *per se*, the effects and/or functions of those genes possibly could be. It is possible that a  
498 phenomenon such as this may be present in these data; a permissive state may be achieved,  
499 whereby we might not detect gene expression changes inherited to F3 and beyond, but we  
500 may see associated genomic conformational or phenotypic changes in F3 and beyond.  
501 Further functional studies based on dietary manipulation are required to confirm this. In  
502 particular, it will be pertinent to prove causality between an epigenetic alteration and a  
503 change in regulation of genes involved in the traits we observe. To do so, we suggest a  
504 combination of phenotypic measures such as assessing lifespan, oxidative stress resistance,

505 and immunity, as well as exploiting mutant *Drosophila* strains for genes of interest, to assess  
506 the effect of epigenetic alterations on downstream gene expression and associated  
507 phenotypes.

508

509 The mechanisms by which environmental perturbations affect the phenotype of the  
510 individual in the next generation are vital to understand. While hints of transgenerational  
511 epigenetic inheritance in more natural situations exist (e.g. (Jablonka and Raz, 2009)), more  
512 work is required to determine if an evolved mechanism exists for this transmission and its  
513 significance for the health, development, and evolution.

514

#### 515 **Funding**

516 This work was supported by a Gravida grant (MP04) to P.K.D.

517

#### 518 **Acknowledgements**

519 Stocks obtained from the Bloomington *Drosophila* Stock Center (NIH P40OD018537) were  
520 used in this study. This work was supported by a Gravida grant (MP04) to P.K.D. Under New  
521 Zealand law, *Drosophila* research is waived from requiring ethical approval, therefore none  
522 were needed for this study. *Drosophila melanogaster* stocks were imported under the HSNO  
523 Approval number GMC001092. All *Drosophila* work was carried out in accordance with the  
524 regulations of the HSNO Act 1996, as described in Morgan, 2012. We are grateful to  
525 Professor Sir Peter Gluckman for his input into, and discussions around, this subject. AJO  
526 would like to thank Professor Martin Kennedy for hosting the latter stages of this work.

527

#### 528 **Data availability**

529 All data supporting this work is included in the supplementary material.

530

531

## 532 **References**

533

- 534 AIKEN, C. E. & OZANNE, S. E. 2013. Transgenerational developmental programming. *Human*  
535 *reproduction update*, dmt043.
- 536 ALJADA, A., MOHANTY, P., GHANIM, H., ABDO, T., TRIPATHY, D., CHAUDHURI, A. &  
537 DANDONA, P. 2004. Increase in intranuclear nuclear factor  $\kappa$ B and decrease in  
538 inhibitor  $\kappa$ B in mononuclear cells after a mixed meal: evidence for a proinflammatory  
539 effect. *The American journal of clinical nutrition*, 79, 682-690.
- 540 ANWAY, M. D., CUPP, A. S., UZUMCU, M. & SKINNER, M. K. 2005. Epigenetic  
541 transgenerational actions of endocrine disruptors and male fertility. *Science*, 308,  
542 1466-1469.
- 543 ANWAY, M. D., LEATHERS, C. & SKINNER, M. K. 2006. Endocrine disruptor vinclozolin  
544 induced epigenetic transgenerational adult-onset disease. *Endocrinology*, 147, 5515-  
545 5523.
- 546 ANWAY, M. D. & SKINNER, M. K. 2006. Epigenetic transgenerational actions of endocrine  
547 disruptors. *Endocrinology*, 147, S43-9.
- 548 BALBUS, J. M., BAROUKI, R., BIRNBAUM, L. S., ETZEL, R. A., GLUCKMAN, P. D., GRANDJEAN,  
549 P., HANCOCK, C., HANSON, M. A., HEINDEL, J. J., HOFFMAN, K., JENSEN, G. K.,  
550 KEELING, A., NEIRA, M., RABADAN-DIEHL, C., RALSTON, J. & TANG, K. C. 2013. Early-  
551 life prevention of non-communicable diseases. *Lancet*, 381, 3-4.
- 552 BARKER, D. J. 2007. The origins of the developmental origins theory. *J. Intern. Med.*, 261,  
553 412-417.
- 554 BARKER, D. J. P. 1997. Maternal nutrition, fetal nutrition, and disease in later life. *Nutrition*,  
555 13, 807-813.
- 556 BAROUKI, R., GLUCKMAN, P., GRANDJEAN, P., HANSON, M. & HEINDEL, J. J. 2012.  
557 Developmental origins of non-communicable disease: implications for research and  
558 public health. *Environ Health*, 11, 42.
- 559 BRUCE, K. D. & HANSON, M. A. 2010. The Developmental Origins, Mechanisms, and  
560 Implications of Metabolic Syndrome. *Journal of Nutrition*, 140, 648-652.
- 561 BRUDASCA, I. & CUCUIANU, M. 2016. Abnormal lipid metabolism in metabolic syndrome: an  
562 epigenetic perspective. *Revista Romana De Medicina De Laborator*, 24, 153-160.
- 563 BUESCHER, J. L., MUSSELMAN, L. P., WILSON, C. A., LANG, T., KELEHER, M., BARANSKI, T. J. &  
564 DUNCAN, J. G. 2013. Evidence for transgenerational metabolic programming in  
565 *Drosophila*. *Disease Models and Mechanisms*, 6.
- 566 BURDGE, G. C., LILLYCROP, K. A., PHILLIPS, E. S., SLATER-JEFFERIES, J. L., JACKSON, A. A. &  
567 HANSON, M. A. 2009. Folic acid supplementation during the juvenile-pubertal period  
568 in rats modifies the phenotype and epigenotype induced by prenatal nutrition. *The*  
569 *Journal of nutrition*, 139, 1054-1060.



- 570 BURDGE, G. C., PHILLIPS, E. S., DUNN, R. L., JACKSON, A. A. & LILLYCROP, K. A. 2004. Effect of  
571 reduced maternal protein consumption during pregnancy in the rat on plasma lipid  
572 concentrations and expression of peroxisomal proliferator-activated receptors in the  
573 liver and adipose tissue of the offspring. *Nutr Res*, 24, 639-646.
- 574 BURDGE, G. C., SLATER-JEFFERIES, J. L., TORRENS, C., PHILLIPS, E. S., HANSEN, M. A. &  
575 LILLYCROP, K. A. 2007a. Dietary protein restriction of pregnant rats in the FO  
576 generation induces altered methylation of hepatic gene promoters in the adult male  
577 offspring in the F1 and F2 generations. *British Journal of Nutrition*, 97, 435-9.
- 578 BURDGE, G. C., STATER-JEFFERIES, J. L., HANSON, M. A. & LILLYCROP, K. A. 2007b.  
579 Differences in protein and folic acid intake in pregnant rats induce sex-specific  
580 changes to the epigenetic regulation of hepatic genes in the adult offspring. *Early*  
581 *Human Development*, 83, S97-S97.
- 582 CALLINAN, P. A. & FEINBERG, A. P. 2006. The emerging science of epigenomics. *Human*  
583 *Molecular Genetics*, 15, R95-R101.
- 584 CARTER, M. J., LARDIES, M. A., NESPOLO, R. F. & BOZINOVIC, F. 2004. Heritability of progeny  
585 size in a terrestrial isopod: transgenerational environmental effects on a life history  
586 trait. *Heredity*, 93, 455-459.
- 587 CENCIONI, C., SPALLOTTA, F., MARTELLI, F., VALENTE, S., MAI, A., ZEIHNER, A. M. & GAETANO,  
588 C. 2013. Oxidative stress and epigenetic regulation in ageing and age-related  
589 diseases. *International journal of molecular sciences*, 14, 17643-17663.
- 590 CERIELLO, A. 2010. Hyperglycaemia and the vessel wall: the pathophysiological aspects on  
591 the atherosclerotic burden in patients with diabetes. *European Journal of*  
592 *Cardiovascular Prevention & Rehabilitation*, 17, s15-s19.
- 593 CHINNUSAMY, V. & ZHU, J.-K. 2009. Epigenetic regulation of stress responses in plants.  
594 *Current opinion in plant biology*, 12, 133-139.
- 595 CHRISTMAN, J. K., SHEIKHNEJAD, G., DIZIK, M., ABILEAH, S. & WAINFAN, E. 1993.  
596 Reversibility of changes in nucleic acid methylation and gene expression induced in  
597 rat liver by severe dietary methyl deficiency. *Carcinogenesis*, 14, 551-557.
- 598 CORDERO, P., LI, J. W. & OBEN, J. A. 2015. Epigenetics of obesity: beyond the genome  
599 sequence. *Current Opinion in Clinical Nutrition and Metabolic Care*, 18, 361-366.
- 600 EL-OSTA, A., BRASACCHIO, D., YAO, D., POCAI, A., JONES, P. L., ROEDER, R. G., COOPER, M. E.  
601 & BROWNLEE, M. 2008. Transient high glucose causes persistent epigenetic changes  
602 and altered gene expression during subsequent normoglycemia. *The Journal of*  
603 *experimental medicine*, 205, 2409-2417.
- 604 FANG, Y.-Z., YANG, S. & WU, G. 2002. Free radicals, antioxidants, and nutrition. *Nutrition*,  
605 18, 872-879.
- 606 FERNÁNDEZ-SÁNCHEZ, A., MADRIGAL-SANTILLÁN, E., BAUTISTA, M., ESQUIVEL-SOTO, J.,  
607 MORALES-GONZÁLEZ, Á., ESQUIVEL-CHIRINO, C., DURANTE-MONTIEL, I., SÁNCHEZ-  
608 RIVERA, G., VALADEZ-VEGA, C. & MORALES-GONZÁLEZ, J. A. 2011. Inflammation,  
609 oxidative stress, and obesity. *International journal of molecular sciences*, 12, 3117-  
610 3132.
- 611 FUJIKI, K., KANO, F., SHIOTA, K. & MURATA, M. 2009. Expression of the peroxisome  
612 proliferator activated receptor  $\gamma$  gene is repressed by DNA methylation in visceral  
613 adipose tissue of mouse models of diabetes. *BMC biology*, 7, 1.
- 614 GALLAGHER, E., NEWMAN, J., GREEN, L. & HANSON, M. 2005. The effect of low protein diet  
615 in pregnancy on the development of brain metabolism in rat offspring. *The Journal of*  
616 *physiology*, 568, 553-558.

- 617 GLUCKMAN, P., HANSON, M. & SPENCER, H. G. 2005. Predictive adaptive responses and  
618 human evolution. *Trends Ecol Evol*, 20, 527-533.
- 619 GLUCKMAN, P. D. & HANSON, M. A. 2004a. Developmental origins of disease paradigm: A  
620 mechanistic and evolutionary perspective. *Pediatric Research*, 56, 311-317.
- 621 GLUCKMAN, P. D. & HANSON, M. A. 2004b. The developmental origins of the metabolic  
622 syndrome. *Trends in Endocrinology & Metabolism*, 15, 183-187.
- 623 GLUCKMAN, P. D., HANSON, M. A. & LOW, F. M. 2011. The Role of Developmental Plasticity  
624 and Epigenetics in Human Health. *Birth Defects Research Part C-Embryo Today-  
625 Reviews*, 93, 12-18.
- 626 GLUCKMAN, P. D., HANSON, M. A. & MITCHELL, M. D. 2010. Developmental origins of health  
627 and disease: reducing the burden of chronic disease in the next generation. *Genome  
628 Medicine*, 2.
- 629 GOLDING, J. 2004. The Avon Longitudinal Study of Parents and Children (ALSPAC)--study  
630 design and collaborative opportunities. *European Journal of Endocrinology*, 151,  
631 U119-U123.
- 632 GOLDING, J. & TEAM, A. S. 2004. The Avon Longitudinal Study of Parents and Children  
633 (ALSPAC) - study design and collaborative opportunities. *European Journal of  
634 Endocrinology*, 151, U119-U123.
- 635 GREGERSEN, S., SAMOCHA-BONET, D., HEILBRONN, L. & CAMPBELL, L. 2012. Inflammatory  
636 and oxidative stress responses to high-carbohydrate and high-fat meals in healthy  
637 humans. *Journal of nutrition and metabolism*, 2012.
- 638 GUERRERO-BOSAGNA, C., SETTLES, M., LUCKER, B. & SKINNER, M. K. 2010. Epigenetic  
639 Transgenerational Actions of Vinclozolin on Promoter Regions of the Sperm  
640 Epigenome. *PloS one*, 5.
- 641 GUPTA, N., SHAH, P., NAYYAR, S. & MISRA, A. 2013. Childhood obesity and the metabolic  
642 syndrome in developing countries. *The Indian Journal of Pediatrics*, 80, 28-37.
- 643 HAGGARTY, P. 2013. Epigenetic consequences of a changing human diet. *Proceedings of the  
644 Nutrition Society*, 72, 363-371.
- 645 HANSON, M. & GLUCKMAN, P. 2015. Developmental origins of health and disease - Global  
646 public health implications. *Best Pract Res Clin Obstet Gynaecol*, 29, 24-31.
- 647 HEIJMANS, B. T., TOBI, E. W., STEIN, A. D., PUTTER, H., BLAUW, G. J., SUSSER, E. S.,  
648 SLAGBOOM, P. E. & LUMEY, L. 2008. Persistent epigenetic differences associated  
649 with prenatal exposure to famine in humans. *Proceedings of the National Academy  
650 of Sciences*, 105, 17046-17049.
- 651 HEINDEL, J. J. 2006. Role of exposure to environmental chemicals in the developmental  
652 basis of reproductive disease and dysfunction. *Seminars in Reproductive Medicine*,  
653 24, 168-177.
- 654 HITCHLER, M. J. & DOMANN, F. E. 2007. An epigenetic perspective on the free radical theory  
655 of development. *Free Radical Biology and Medicine*, 43, 1023-1036.
- 656 HOILE, S. P., IRVINE, N. A., KELSALL, C. J., SIBBONS, C., FEUNTEUN, A., COLLISTER, A.,  
657 TORRENS, C., CALDER, P. C., HANSON, M. A. & LILLYCROP, K. A. 2013. Maternal fat  
658 intake in rats alters 20: 4n-6 and 22: 6n-3 status and the epigenetic regulation of  
659 Fads2 in offspring liver. *The Journal of nutritional biochemistry*, 24, 1213-1220.
- 660 HOLLIDAY, R. & PUGH, J. E. 1975. DNA modification mechanisms and gene activity during  
661 development. *Science*, 187, 226-232.

- 662 HUANG, D. W., SHERMAN, B. T. & LEMPICKI, R. A. 2009a. Bioinformatics enrichment tools:  
663 paths toward the comprehensive functional analysis of large gene lists. *Nucleic acids*  
664 *research*, 37, 1-13.
- 665 HUANG, D. W., SHERMAN, B. T. & LEMPICKI, R. A. 2009b. Systematic and integrative analysis  
666 of large gene lists using DAVID bioinformatics resources. *Nature protocols*, 4, 44-57.
- 667 JABLONKA, E. & RAZ, G. 2009. Transgenerational epigenetic inheritance: prevalence,  
668 mechanisms, and implications for the study of heredity and evolution. *Quarterly*  
669 *Review of Biology*, 84, 131-176.
- 670 JACOMETO, C. B., OSORIO, J. S., SOCHA, M., CORREA, M. N., PICCIOLI-CAPPELLI, F., TREVISI,  
671 E. & LOOR, J. J. 2015. Maternal consumption of organic trace minerals alters calf  
672 systemic and neutrophil mRNA and microRNA indicators of inflammation and  
673 oxidative stress. *Journal of Dairy Science*, 98, 7717-7729.
- 674 JIRTLE, R. L. & SKINNER, M. K. 2007. Environmental epigenomics and disease susceptibility.  
675 *Nature Reviews Genetics*, 8, 253-262.
- 676 KANG, I. J., YOKOTA, H., OSHIMA, Y., TSURUDA, Y., OE, T., IMADA, N., TADOKORO, H. &  
677 HONJO, T. 2002. Effects of bisphenol A on the reproduction of Japanese medaka  
678 (*Oryzias latipes*). *Environmental Toxicology and Chemistry*, 21, 2394-2400.
- 679 KLIP, H., VERLOOP, J., VAN GOOL, J. D., KOSTER, M., BURGER, C. W., VAN LEEUWEN, F. E. &  
680 GRP, O. P. 2002. Hypospadias in sons of women exposed to diethylstilbestrol in  
681 utero: a cohort study. *Lancet*, 359, 1102-1107.
- 682 LAHIRI, D. K., MALONEY, B., RIYAZ BASHA, M., WEN GE, Y. & ZAWIA, N. H. 2007. How and  
683 when environmental agents and dietary factors affect the course of Alzheimer's  
684 disease: the "LEARn" model (latent early-life associated regulation) may explain the  
685 triggering of AD. *Current alzheimer research*, 4, 219-228.
- 686 LANGIE, S. A., ACHTERFELDT, S., GORNIK, J. P., HALLEY-HOGG, K. J., OXLEY, D., VAN  
687 SCHOOTEN, F. J., GODSCHALK, R. W., MCKAY, J. A. & MATHERS, J. C. 2013. Maternal  
688 folate depletion and high-fat feeding from weaning affects DNA methylation and  
689 DNA repair in brain of adult offspring. *The FASEB Journal*, 27, 3323-3334.
- 690 LANGLEY-EVANS, S. 2015. Nutrition in early life and the programming of adult disease: a  
691 review. *Journal of Human Nutrition and Dietetics*, 28, 1-14.
- 692 LANGLEY, S. C., SEAKINS, M., GRIMBLE, R. F. & JACKSON, A. A. 1994. The acute phase  
693 response of adult rats is altered by in utero exposure to maternal low protein diets.  
694 *The Journal of nutrition*, 124, 1588-1596.
- 695 LEE, H. S. 2015. Impact of Maternal Diet on the Epigenome during In Utero Life and the  
696 Developmental Programming of Diseases in Childhood and Adulthood. *Nutrients*, 7,  
697 9492-9507.
- 698 LI, C. C. Y., MALONEY, C. A., CROPLEY, J. E. & SUTER, C. M. 2010. Epigenetic programming by  
699 maternal nutrition: shaping future generations. *Epigenomics*, 2, 539-549.
- 700 LILLYCROP, K. A. & BURDGE, G. C. 2011. The Effect of Nutrition during Early Life on the  
701 Epigenetic Regulation of Transcription and Implications for Human Diseases. *Journal*  
702 *of Nutrigenetics and Nutrigenomics*, 4, 248-260.
- 703 LILLYCROP, K. A. & BURDGE, G. C. 2015. Maternal diet as a modifier of offspring epigenetics.  
704 *Journal of Developmental Origins of Health and Disease*, 6, 88-95.
- 705 LILLYCROP, K. A., SLATER-JEFFERIES, J. L., HANSON, M., GODFREY, K., JACKSON, A. A. &  
706 BURDGE, G. C. 2007. Induction of altered epigenetic regulation of the hepatic  
707 glucocorticoid receptor in the offspring of rats fed a protein-restricted diet during  
708 pregnancy suggests that reduced DNA methyltransferase-1 expression is involved in

- 709 impaired DNA methylation and changes in histone modifications. *British Journal of*  
710 *Nutrition*, 97, 1064-1073.
- 711 LIU, J. & RAINE, A. 2006. The effect of childhood malnutrition on externalizing behavior.  
712 *Current opinion in pediatrics*, 18, 565-570.
- 713 LIU, J., ZHAO, S. R. & REYES, T. 2015. Neurological and Epigenetic Implications of Nutritional  
714 Deficiencies on Psychopathology: Conceptualization and Review of Evidence.  
715 *International journal of molecular sciences*, 16, 18129-18148.
- 716 LUTTMER, R., SPIJKERMAN, A. M., KOK, R. M., JAKOBS, C., BLOM, H. J., SERNE, E. H., DEKKER,  
717 J. M. & SMULDERS, Y. M. 2013. Metabolic syndrome components are associated  
718 with DNA hypomethylation. *Obesity research & clinical practice*, 7, e106-e115.
- 719 MASUYAMA, H., MITSUI, T., EGUCHI, T., TAMADA, S. & HIRAMATSU, Y. 2016. The effects of  
720 paternal high-fat diet exposure on offspring metabolism with epigenetic changes in  
721 the mouse adiponectin and leptin gene promoters. *American Journal of Physiology-*  
722 *Endocrinology and Metabolism*, 311, E236-E245.
- 723 MCGOWAN, P. O., MEANEY, M. J. & ZYF, M. 2008. Diet and the epigenetic (re)  
724 programming of phenotypic differences in behavior. *Brain research*, 1237, 12-24.
- 725 MIGLIORE, L. & COPPEDÈ, F. 2009. Environmental-induced oxidative stress in  
726 neurodegenerative disorders and aging. *Mutation Research/Genetic Toxicology and*  
727 *Environmental Mutagenesis*, 674, 73-84.
- 728 MILAGRO, F., CAMPION, J., GARCIA-DIAZ, D., GOYENECHEA, E., PATERNAIN, L. & MARTINEZ,  
729 J. 2009. High fat diet-induced obesity modifies the methylation pattern of leptin  
730 promoter in rats. *Journal of physiology and biochemistry*, 65, 1-9.
- 731 MORGAN, S. M. 2012. *Nutrition Forced Extension of Lifespan in Drosophila: A Whole-*  
732 *Genome Investigation*. University of Otago.
- 733 MUSSELMAN, L. P., FINK, J. L., NARZINSKI, K., RAMACHANDRAN, P. V., HATHIRAMANI, S. S.,  
734 CAGAN, R. L. & BARANSKI, T. J. 2011. A high-sugar diet produces obesity and insulin  
735 resistance in wild-type *Drosophila*. *Disease Models and Mechanisms*, 4, 842-849.
- 736 NEUGEBAUER, R., HOEK, H. W. & SUSSER, E. 1999. Prenatal exposure to wartime famine and  
737 development of antisocial personality disorder in early adulthood. *Jama*, 282, 455-  
738 462.
- 739 NEWBOLD, R. R., PADILLA-BANKS, E. & JEFFERSON, W. N. 2006. Adverse effects of the model  
740 environmental estrogen diethylstilbestrol are transmitted to subsequent  
741 generations. *Endocrinology*, 147, S11-7.
- 742 NICULESCU, M. D., YAMAMURO, Y. & ZEISEL, S. H. 2004. Choline availability modulates  
743 human neuroblastoma cell proliferation and alters the methylation of the promoter  
744 region of the cyclin-dependent kinase inhibitor 3 gene. *Journal of neurochemistry*,  
745 89, 1252-1259.
- 746 OSBORNE, A. J., DUNCAN, E. J., CRIDGE, A. G. & DEARDEN, P. K. 2013. Epigenetics and the  
747 maternal germline. In: TOLLEFSBOL, T. (ed.) *Transgenerational Epigenetics: Evidence*  
748 *and Debate*. Waltham, MA: Elsevier.
- 749 PATEL, C., GHANIM, H., RAVISHANKAR, S., SIA, C. L., VISWANATHAN, P., MOHANTY, P. &  
750 DANDONA, P. 2007. Prolonged reactive oxygen species generation and nuclear  
751 factor- $\kappa$ B activation after a high-fat, high-carbohydrate meal in the obese. *The*  
752 *Journal of Clinical Endocrinology & Metabolism*, 92, 4476-4479.
- 753 PEASTON, A. E. & WHITELAW, E. 2006. Epigenetics and phenotypic variation in mammals.  
754 *Mammalian Genome*, 17, 365-374.

- 755 PLAGEMANN, A., HARDER, T., BRUNN, M., HARDER, A., ROEPKE, K., WITTRÖCK-STAAAR, M.,  
756 ZISKA, T., SCHELLONG, K., RODEKAMP, E. & MELCHIOR, K. 2009. Hypothalamic  
757 proopiomelanocortin promoter methylation becomes altered by early overfeeding:  
758 an epigenetic model of obesity and the metabolic syndrome. *The Journal of*  
759 *physiology*, 587, 4963-4976.
- 760 PORTHA, B. 2005. Programmed disorders of beta-cell development and function as one  
761 cause for type 2 diabetes? - The GK rat paradigm. *Diabetes-Metabolism Research*  
762 *and Reviews*, 21, 495-504.
- 763 REAMON-BUETTNER, S. M., BUSCHMANN, J. & LEWIN, G. 2014. Identifying placental  
764 epigenetic alterations in an intrauterine growth restriction (IUGR) rat model induced  
765 by gestational protein deficiency. *Reprod Toxicol*, 45, 117-124.
- 766 RISTOW, M. & SCHMEISSER, S. 2011. Extending life span by increasing oxidative stress. *Free*  
767 *Radical Biology and Medicine*, 51, 327-336.
- 768 ROUSSOU, I. G., SAVAKIS, C., TAVERNARAKIS, N. & METAXAKIS, A. 2016. Stage dependent  
769 nutritional regulation of transgenerational longevity. *Nutrition and Healthy Aging*, 1-  
770 8.
- 771 SÁNCHEZ, I., REYNOSO-CAMACHO, R. & SALGADO, L. M. 2015. The diet-induced metabolic  
772 syndrome is accompanied by whole-genome epigenetic changes. *Genes & nutrition*,  
773 10, 1-11.
- 774 SKINNER, M. K. 2011. Role of Epigenetics in Developmental Biology and Transgenerational  
775 Inheritance. *Birth Defects Research Part C-Embryo Today-Reviews*, 93, 51-55.
- 776 SKINNER, M. K., HAQUE, C. G.-B. M., NILSSON, E., BHANDARI, R. & MCCARREY, J. R. 2013.  
777 Environmentally induced transgenerational epigenetic reprogramming of primordial  
778 germ cells and the subsequent germ line. *PloS one*, 8, e66318-e66318.
- 779 SUSSER, E., NEUGEBAUER, R., HOEK, H. W., BROWN, A. S., LIN, S., LABOVITZ, D. & GORMAN,  
780 J. M. 1996. Schizophrenia after prenatal famine: further evidence. *Archives of*  
781 *general psychiatry*, 53, 25-31.
- 782 SUSSER, E. S. & LIN, S. P. 1992. Schizophrenia after prenatal exposure to the Dutch Hunger  
783 Winter of 1944-1945. *Archives of general psychiatry*, 49, 983-988.
- 784 TABATON, M. & TAMAGNO, E. 2007. The molecular link between [beta]- and [gamma]-  
785 secretase activity on the amyloid [beta] precursor protein. *Cellular and Molecular*  
786 *Life Sciences*, 64, 2211.
- 787 TARRY-ADKINS, J. L. & OZANNE, S. E. 2011. Mechanisms of early life programming: current  
788 knowledge and future directions. *The American journal of clinical nutrition*, 94,  
789 1765S-1771S.
- 790 TEAM, R. C. 2008. R: A Language and Environment for Statistical Computing. Vienna, Austria:  
791 R Foundation for Statistical Computing.
- 792 TSUI, M. T. K. & WANG, W. X. 2004. Maternal transfer efficiency and transgenerational  
793 toxicity of methylmercury in *Daphnia magna*. *Environmental Toxicology and*  
794 *Chemistry*, 23, 1504-1511.
- 795 UAUY, R., KAIN, J. & CORVALAN, C. 2011. How can the Developmental Origins of Health and  
796 Disease (DOHaD) hypothesis contribute to improving health in developing countries?  
797 *Am J Clin Nutr.*, 94, 1759S-1764S.
- 798 VAISERMAN, A. 2014. Early-life nutritional programming of longevity. *Journal of*  
799 *developmental origins of health and disease*, 5, 325-338.
- 800 VAN STRATEN, E. M. E., BLOKS, V. W., HUIJKMAN, N. C. A., BALLER, J. F. W., VAN MEER, H.,  
801 LUTJOHANN, D., KUIPERS, F. & PLOSCH, T. 2010. The liver x-receptor gene promoter

802 is hypermethylated in a mouse model of prenatal protein restriction. *Am J Physiol*  
803 *Regul Integr Comp Physiol*, 298, R275-R282.

804 VICKERS, M. 2014a. Developmental programming and transgenerational transmission of  
805 obesity. *Annals of Nutrition and Metabolism*, 64, 26-34.

806 VICKERS, M. H. 2014b. Early Life Nutrition, Epigenetics and Programming of Later Life  
807 Disease. *Nutrients*, 6, 2165-2178.

808 VUCETIC, Z., KIMMEL, J., TOTOKI, K., HOLLENBECK, E. & REYES, T. M. 2010. Maternal high-fat  
809 diet alters methylation and gene expression of dopamine and opioid-related genes.  
810 *Endocrinology*, 151, 4756-4764.

811 WATERLAND, R. A. & JIRTLE, R. L. 2003. Transposable elements: targets for early nutritional  
812 effects on epigenetic gene regulation. *Mol Cell Biol*, 23, 5293-300.

813 WATERLAND, R. A., LIN, J.-R., SMITH, C. A. & JIRTLE, R. L. 2006. Post-weaning diet affects  
814 genomic imprinting at the insulin-like growth factor 2 (Igf2) locus. *Human molecular*  
815 *genetics*, 15, 705-716.

816 XIA, B. & DE BELLE, S. 2016. Transgenerational programming of longevity and reproduction  
817 by post-eclosion dietary manipulation in *Drosophila*. *Aging*, 8.

818 XIA, B., GERSTIN, E., SCHONES, D. E., HUANG, W. & STEVEN DE BELLE, J. 2016.  
819 Transgenerational programming of longevity through E(z)-mediated histone H3K27  
820 trimethylation in *Drosophila*. *Aging*, [Epub ahead of print].

821 XUE, J. & IDERAABDULLAH, F. Y. 2016. An assessment of molecular pathways of obesity  
822 susceptible to nutrient, toxicant and genetically induced epigenetic perturbation.  
823 *Journal of Nutritional Biochemistry*, 30, 1-13.

824 YANG, Z.-H., MIYAHARA, H., TAKEO, J. & KATAYAMA, M. 2012. Diet high in fat and sucrose  
825 induces rapid onset of obesity-related metabolic syndrome partly through rapid  
826 response of genes involved in lipogenesis, insulin signalling and inflammation in  
827 mice. *Diabetology & metabolic syndrome*, 4, 1.

828

## 829 **Figure Legends**

830

831 Figure 1 – Fly diet experiments. LPHC, low protein, high carbohydrate (standard) diet; HPLC,  
832 high protein low carbohydrate diet; F1(M), F2(M) and F3(M), flies maintained on LPHC diet  
833 for three generations; F1(MM), F2(MM) and F3(MM), flies that were raised on HPLC in the F0  
834 generation, and mismatched back to LPHC at eclosion in the F1 generation, and were  
835 maintained for two more generations on the mismatched (LPHC) diet. Boxed numbers  
836 denote the number of replicates used for each condition for transcriptomic experiments.

837

838 Figure 2 – Indicative graphs of gene expression of genes up-regulated in the F0 generation,  
839 with significances as determined by ANOVA, between F0-F3 generations on matched and  
840 mismatched diets. Pairwise comparisons by Tukey’s posthoc testing indicated by solid and  
841 dashed lines, as described in the key. Y axis denotes mean expression level from  
842 transcriptomic experiments, X axis denotes the dietary condition as per Figure 1. Note  
843 differing Y axis scales. Gene names are stated as per their FlyBase gene symbol IDs.

844

845 Figure 3 – Indicative graphs of gene expression of genes down-regulated in the F0  
846 generation, with significances as determined by ANOVA, between F0-F3 generations on  
847 matched and mismatched diets. Pairwise comparisons by Tukey’s posthoc testing indicated  
848 by solid and dashed lines, as described in the key. Y axis denotes mean expression level  
849 from transcriptomic experiments, X axis denotes the dietary condition as per Figure 1. Note  
850 differing Y axis scales. Gene names are stated as per their FlyBase gene symbol IDs.

851

## 852 **Table Legends**

853

854 Table 1 – Fly diet components and content information

855

856 Table 2 – Codeset design for Nanostring. Gene, gene symbol based on FlyBase

857 nomenclature; NSID, Nanostring internal identifier; Position, region in the target mRNA

858 being probed

859

860 Table 3 – Functional annotation clustering (FAC) as performed in DAVID. Genes that were

861 significantly up-regulated in these data in HPLC compared to LPHC were compared to a

862 background list of genes that were expressed and detected in these data. Analyses of  
863 variance were carried out on expression between all samples in this study (F0-F3 matched  
864 and mismatched) with p-values and statistical significances listed.

865

866 Table 4 – Functional annotation clustering (FAC) as performed in DAVID. Genes that were  
867 significantly down-regulated in these data in HPLC compared to LPHC were compared to a  
868 background list of genes that were expressed and detected in these data. Analyses of  
869 variance were carried out on expression between all samples in this study (F0-F3 matched  
870 and mismatched) with p-values and statistical significances listed.

871

## 872 **Supplementary Files**

873

874 Supplementary file 1

875 Supplementary file 1.xlsx

876 Summary statistics from RNA sequencing experiments.

877 All experiments were carried out on the Illumina platform. The libraries were prepared using  
878 TruSeq stranded mRNA sample preparation kit according to the manufacturer's protocol  
879 (Illumina). All libraries were normalised, pooled and pair-end sequenced on 2 lanes of high-  
880 output flowcell HiSeq 2500, V3 chemistry (Illumina), generating 100-bp reads. Libraries had  
881 an average insert size of ~208bp.

882

883 Supplementary file 2

884 Supplementary file 2.xlsx



885 Drosophila genes that are significantly differentially expressed between HPLC and LPHC F0  
886 generation.

887 12,424 Drosophila genes were expressed and detected in these transcriptomic experiments.

888 Of these 12,424 genes, 2946 were differentially expressed (1074 [8.6%] down-regulated and

889 1872 [15.1%] up-regulated), with an absolute fold change of >1.5, and an FDR-corrected p-

890 value of <0.001, as determined by EDGE test as implemented in CLC.

891

892 Supplementary file 3

893 Supplementary file 3.xlsx

894 Transcriptomic data validated by Nanostring:

895 100ng total RNA in 5uL total volume was processed using the standard nCounter XT Total

896 RNA protocol. The Codeset consists of Reporter and Capture probes that hybridise the target

897 sequence of interest, forming a tripartite complex. Hybridised samples were processed in

898 batches of 12 using the High Sensitivity Protocol (3 hours). Raw data was exported and QC-

899 checked using Nanostring's nSolver data analysis tool ([www.nanostring.com](http://www.nanostring.com)). As per the

900 Nanostring CodeSet design criteria, 25 candidate genes for validation were chosen, with two

901 housekeeping genes incorporated within this amount (Mnf and Rpl32). Raw data was

902 normalised to the geometric mean of both the positive controls (included in the

903 hybridisation steps) and the nominated housekeeping genes. Normalised Nanostring data

904 (expression level) was compared to transcriptomic data (mean expression level) and the

905 Pearson's correlation coefficient was calculated in R

906

907 Supplementary file 4

908 Supplementary file 4.xlsx

909 Analyses of variance (ANOVA) of F0-F3 matched and mismatched dietary conditions, up and  
910 down regulated genes.

911 ANOVAs of genes that have been identified through FAC as being significantly up or  
912 downregulated in the F0 generation (in HPLC, vs. LPHC). Df = degrees of freedom, Sum sq =  
913 sums of squares, Mean sq = mean squares, F value = ANOVA F value, Pr(>F) = p-value of  
914 significance of F, S<sub>ignificance</sub> = significance indicator. Gene name = FlyBase gene symbol.

915

916 Supplementary file 5

917 Supplementary file 5.xlsx

918 Pairwise comparisons/Tukey's posthoc testing of significant ANOVAs of genes that were  
919 significantly upregulated in the F0 generation.

920 These data indicate the significant differences between the means of the different nutritional  
921 states (matched/mismatched) and generations. diff = difference, lwr,upr = confidence  
922 intervals, p adj = p value adjusted for multiple testing.

923

924 Supplementary file 6

925 Supplementary file 6.xlsx

926 Pairwise comparisons/Tukey's posthoc testing of significant ANOVAs of genes that were  
927 significantly downregulated in the F0 generation.

928 These data indicate the significant differences between the means of the different nutritional  
929 states (matched/mismatched) and generations. diff = difference, lwr,upr = confidence  
930 intervals, p adj = p value adjusted for multiple testing.

931

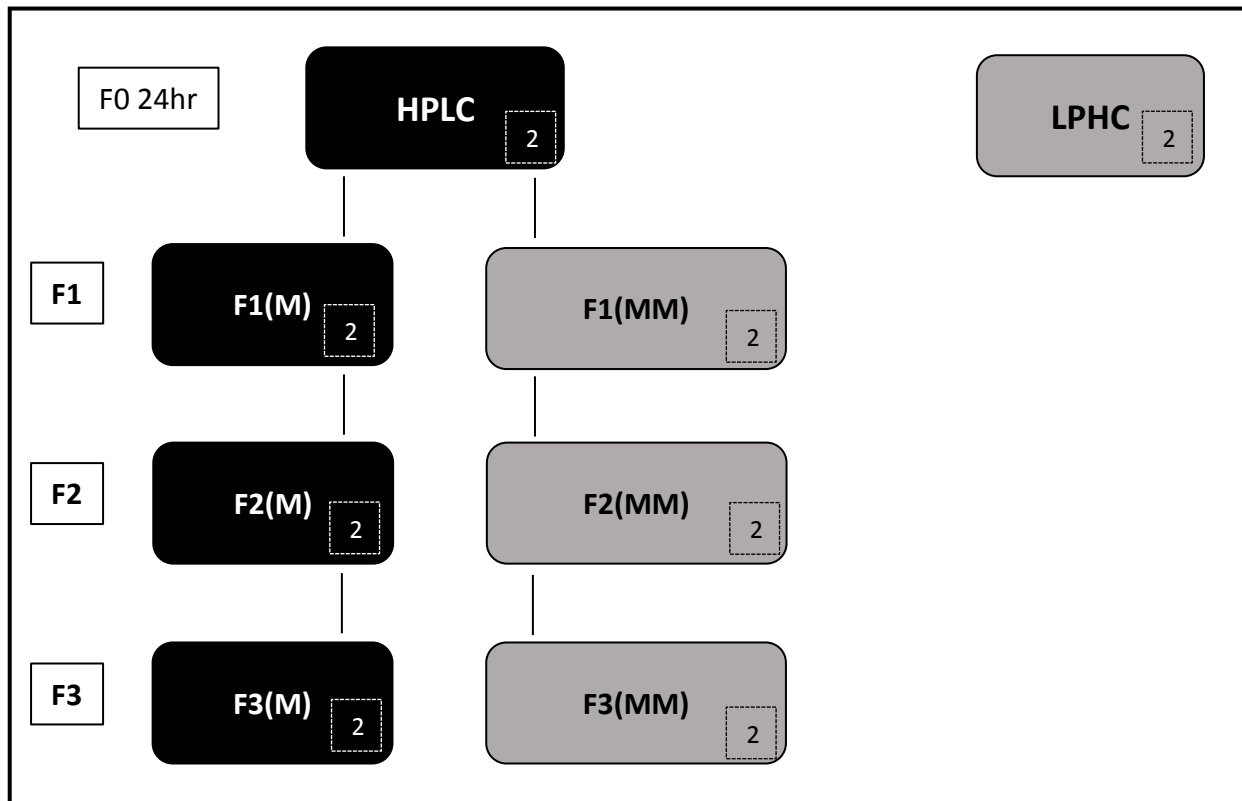

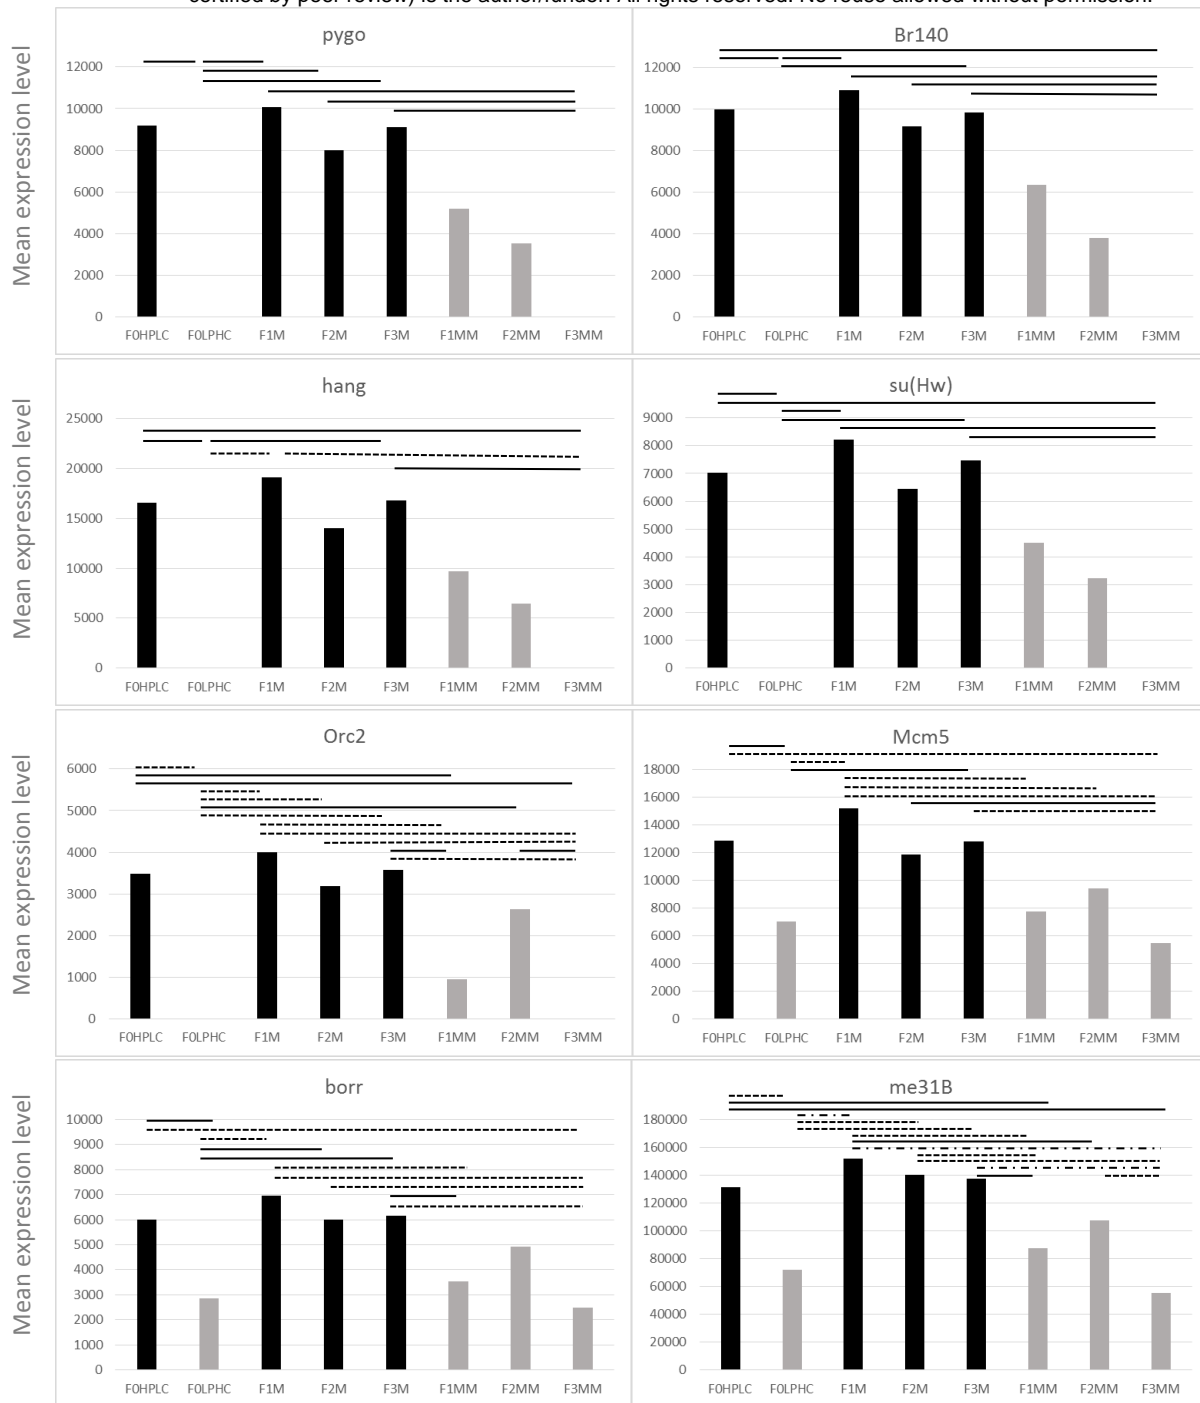

————— Tukey's posthoc testing significant at  $p < 0.05$  \*  
 - - - - - Tukey's posthoc testing significant at  $p < 0.01$  \*\*  
 - · - · - Tukey's posthoc testing significant at  $p < 0.001$  \*\*\*

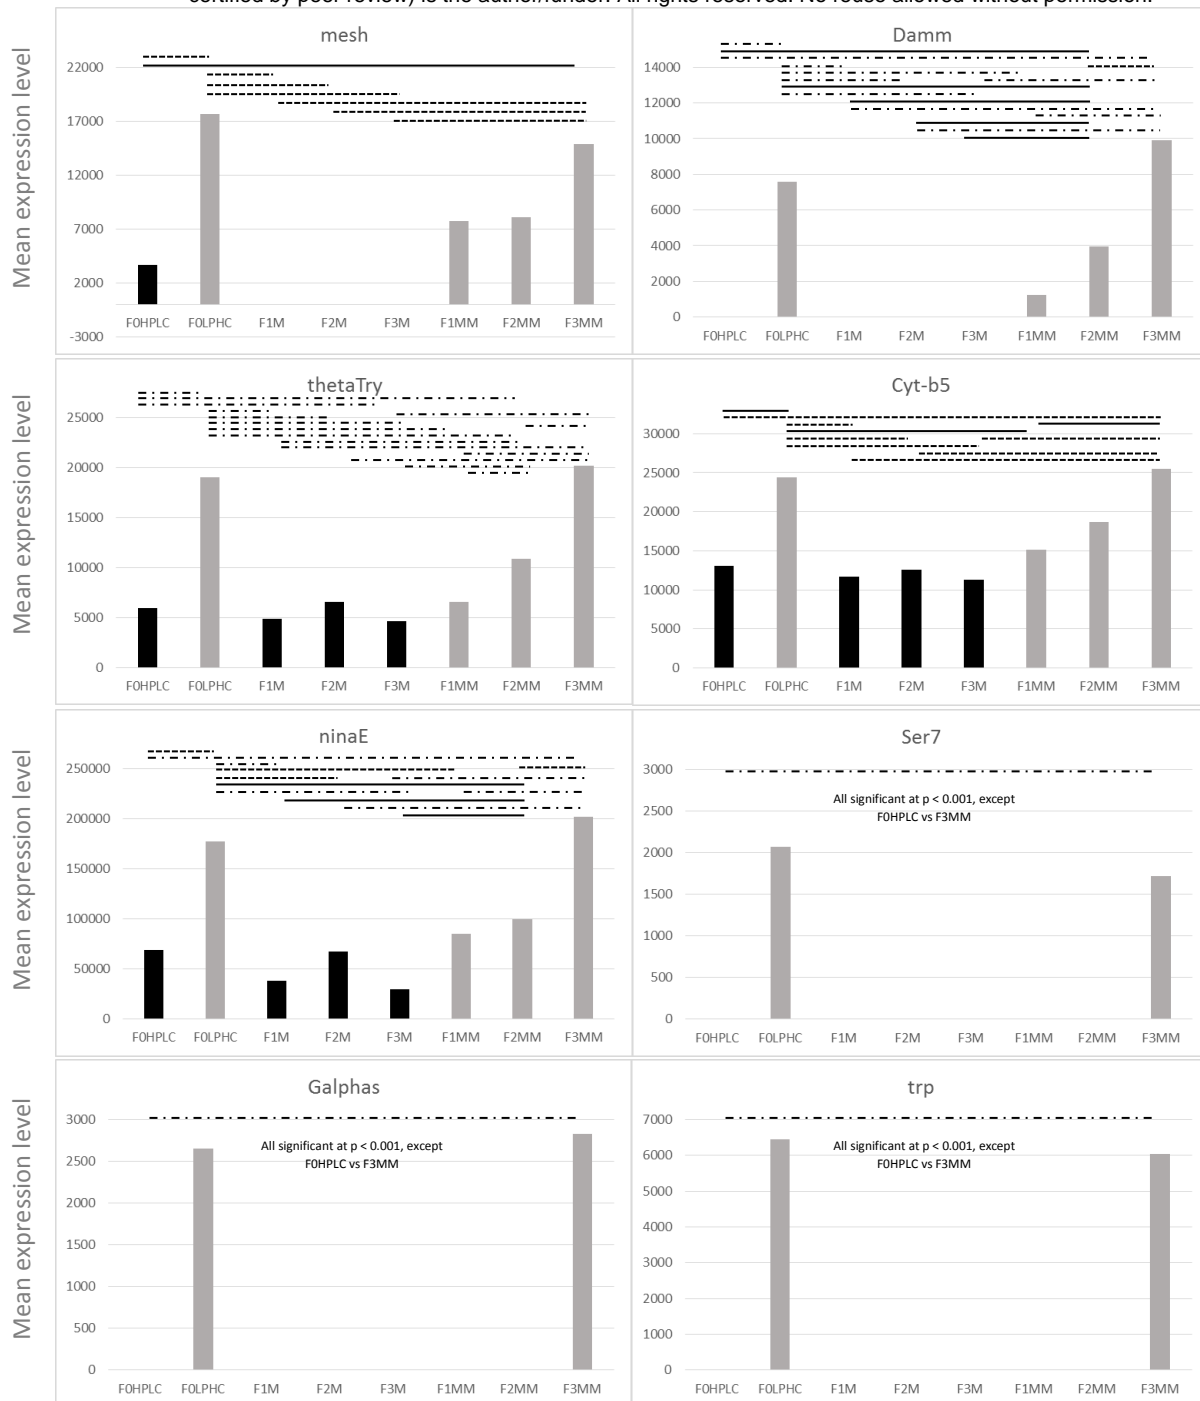

———— Tukey's posthoc testing significant at  $p < 0.05$  \*

----- Tukey's posthoc testing significant at  $p < 0.01$  \*\*

- · - · Tukey's posthoc testing significant at  $p < 0.001$  \*\*\*

Table 1

| <b>Component</b>    | <b>High Protein</b> | <b>Low protein</b> |
|---------------------|---------------------|--------------------|
| Agar (g)            | 9                   | 9                  |
| Cornmeal (g)        | 66.7                | 66.7               |
| Sugar (g)           | 31.24               | 46.7               |
| Yeast (g)           | 148.76              | 16.7               |
| Propionic acid (ml) | 6.6                 | 6.6                |
| Nipagen (ml)        | 5                   | 5                  |
| Water (L)           | 1                   | 1                  |
| Protein (%)         | 8                   | 5.3                |
| Gross energy (KJ/g) | 0.9                 | 2.1                |
| Yeast:sugar ratio   | 01:00.2             | 01:02.8            |

Table 2

| Gene         | Accession   | Position  | NSID             |
|--------------|-------------|-----------|------------------|
| asf1         | NM_079439.2 | 601-700   | NM_079439.2:600  |
| Caf1-105     | NM_136745.3 | 1231-1330 | NM_136745.3:1230 |
| Def          | NM_078948.2 | 8-107     | NM_078948.2:7    |
| E(bx)        | NM_167819.2 | 4681-4780 | NM_167819.2:4680 |
| E(Pc)        | NM_078974.2 | 2551-2650 | NM_078974.2:2550 |
| E(spl)m4-BFM | NM_079786.1 | 241-340   | NM_079786.1:240  |
| E(spl)m5-HLH | NM_079787.2 | 396-495   | NM_079787.2:395  |
| Fbp1         | NM_079341.1 | 3001-3100 | NM_079341.1:3000 |
| Mnf          | NM_168444.1 | 866-965   | NM_168444.1:865  |
| Hml          | NM_079336.2 | 7236-7335 | NM_079336.2:7235 |
| Hmt4-20      | NM_130497.2 | 3201-3300 | NM_130497.2:3200 |
| Inos         | NM_058057.4 | 1026-1125 | NM_058057.4:1025 |
| Lip3         | NM_057983.3 | 946-1045  | NM_057983.3:945  |
| Lsd-1        | NM_170092.2 | 836-935   | NM_170092.2:835  |
| Lsp1beta     | NM_057276.3 | 1351-1450 | NM_057276.3:1350 |
| Ocho         | NM_080514.1 | 416-515   | NM_080514.1:415  |
| Pc           | NM_079475.2 | 991-1090  | NM_079475.2:990  |
| Pgm          | NM_079936.2 | 841-940   | NM_079936.2:840  |
| Rpl32        | NM_170461.1 | 342-441   | NM_170461.1:341  |
| Sap30        | NM_132934.2 | 216-315   | NM_132934.2:215  |
| Su(var)3-3   | NM_140937.2 | 1781-1880 | NM_140937.2:1780 |
| Su(var)3-7   | NM_079618.2 | 3516-3615 | NM_079618.2:3515 |
| Top2         | NM_057412.3 | 3111-3210 | NM_057412.3:3110 |
| Tps1         | NM_134983.2 | 2056-2155 | NM_134983.2:2055 |
| Ubx          | NM_206497.1 | 1321-1420 | NM_206497.1:1320 |

| Annotation Category              | Term                                        | Enrichment score                                  | Gene                             | FlyBase Gene ID              | Function                                                                              | p-value of ANOVA | Significance of ANOVA |
|----------------------------------|---------------------------------------------|---------------------------------------------------|----------------------------------|------------------------------|---------------------------------------------------------------------------------------|------------------|-----------------------|
| Interpro                         | Zinc finger                                 | 10.64                                             | Bre1                             | FBgn0086694                  | Ubiquitinates histone H2B on lysine 120 at most RNA Polymerase II transcribed genes   | 0.0304           | *                     |
|                                  |                                             |                                                   | pygo                             | FBgn0043900                  | Binds His3 methylated tail to associate with arm as part of Wnt-induced transcription | 0.0030           | **                    |
|                                  |                                             |                                                   | e(y)3                            | FBgn0087008                  | PBAF complex, chromatin binding and gene silencing                                    | 0.0596           | .                     |
|                                  |                                             |                                                   | nej                              | FBgn0261617                  | Acetylates histone proteins and regulated gene expression                             | 0.1420           | NS                    |
|                                  |                                             |                                                   | E(bx)                            | FBgn0000541                  | Nucleosome remodelling, chromatin organisation                                        | 0.0809           | NS                    |
|                                  |                                             |                                                   | Pcl                              | FBgn0003044                  | Chromatin binding, colocalises with the ESC/E(Z) complex                              | 0.0439           | *                     |
| Interpro/GOTERM_MF_DIRECT        | Zinc finger, DNA binding                    | 4.64                                              | E(var)3-9                        | FBgn0260243                  | Chromatin maintenance                                                                 | 0.0014           | **                    |
|                                  |                                             |                                                   | Br140                            | FBgn0033155                  | Enhancer of polycomb-like                                                             | 0.0027           | **                    |
|                                  |                                             |                                                   | MTA1-like                        | FBgn0027951                  | Chromatin binding, chromosome condensation                                            | 0.0665           | .                     |
|                                  |                                             |                                                   | spn-E                            | FBgn0003483                  | Chromatin binding, chromosome condensation                                            | 0.0153           | *                     |
|                                  |                                             |                                                   | hang                             | FBgn0026575                  | Response to oxidative stress                                                          | 0.0031           | **                    |
|                                  |                                             |                                                   | phol                             | FBgn0035997                  | Polycomb group protein recruitment to Polycomb Response Elements                      | 0.0006           | ***                   |
|                                  |                                             |                                                   | Chd1                             | FBgn0250786                  | Remodelling and assembly of chromatin                                                 | 0.0865           | .                     |
|                                  |                                             |                                                   | Cp190                            | FBgn0000283                  | Chromatin binding                                                                     | 0.0165           | *                     |
|                                  |                                             |                                                   | cg                               | FBgn0000289                  | Binds to Polycomb Response Elements                                                   | 0.0047           | **                    |
|                                  |                                             |                                                   | su(Hw)                           | FBgn0003567                  | Negative regulation of chromatin silencing                                            | 0.0058           | **                    |
|                                  |                                             |                                                   | Chd3                             | FBgn0023395                  | Chromatin assembly or disassembly, nucleosome remodelling                             | 0.0027           | **                    |
|                                  |                                             |                                                   | GOTERM_BP/MF/CC_DIRECT, INTERPRO | DNA replication, MCM complex | 4.42                                                                                  | Orc1             | FBgn0022772           |
| Orc4                             | FBgn0023181                                 | Initiation of DNA replication                     |                                  |                              |                                                                                       | 0.0136           | *                     |
| Orc2                             | FBgn0015270                                 | DNA replication, chromatin binding                |                                  |                              |                                                                                       | 0.0004           | ***                   |
| Mcm5                             | FBgn0017577                                 | Chromatin binding, chromosome condensation        |                                  |                              |                                                                                       | 0.0008           | ***                   |
| RecQ4                            | FBgn0040290                                 | DNA stability, DNA rewinding                      |                                  |                              |                                                                                       | 0.0047           | **                    |
| Mcm10                            | FBgn0032929                                 | Heterochromatin organisation, chromatin silencing |                                  |                              |                                                                                       | 0.0008           | ***                   |
| polybromo                        | FBgn0039227                                 | Chromatin binding                                 |                                  |                              |                                                                                       | 0.0104           | *                     |
| GOTERM_BP/MF/CC_DIRECT, INTERPRO | Microtubules, kinesin                       | 4.05                                              | cid                              | FBgn0040477                  | Histone H3 variant, epigenetic mark for centromere identity                           | 0.0000           | ***                   |
| GOTERM_MF_DIRECT, INTERPRO       | Helicase                                    | 3.10                                              | XNP                              | FBgn0039338                  | Heterochromatin organisation, chromatin silencing                                     | 0.0924           | .                     |
|                                  |                                             |                                                   | me31B                            | FBgn0004419                  | Gene silencing by miRNA                                                               | 0.0001           | ***                   |
|                                  |                                             |                                                   | Mi-2                             | FBgn0262519                  | Chromatin binding, nucleosome binding                                                 | 0.0261           | *                     |
| INTERPRO                         | Structural maintenance of chromosomes       | 2.61                                              | SMC2                             | FBgn0027783                  | Chromatin binding, chromosome condensation                                            | 0.0020           | **                    |
|                                  |                                             |                                                   | glu                              | FBgn0015391                  | Chromatin binding, chromosome condensation                                            | 0.0146           | *                     |
|                                  |                                             |                                                   | SMC1                             | FBgn0040283                  | Chromatin binding                                                                     | 0.0263           | *                     |
|                                  |                                             |                                                   | SMC3                             | FBgn0015615                  | Chromatin binding                                                                     | 0.0129           | *                     |
| GOTERM_CC/BP_DIRECT              | Rb-E2F complex, Myb complex                 | 2.32                                              | mor                              | FBgn0002783                  | Brahma associated proteins complex, PBAF complex                                      | 0.0100           | *                     |
| INTERPRO, GOTERM_MF_DIRECT       | Chromo domain                               | 1.99                                              | Chro                             | FBgn0044324                  | Histone binding, chromosome organisation                                              | 0.0098           | **                    |
|                                  |                                             |                                                   | Chd1                             | FBgn0250786                  | Remodelling and assembly of chromatin                                                 | 0.0865           | .                     |
|                                  |                                             |                                                   | Mi-2                             | FBgn0262519                  | Chromatin binding, nucleosome binding                                                 | 0.0261           | *                     |
|                                  |                                             |                                                   | msl-3                            | FBgn0002775                  | Methylated histone binding, chromatin binding                                         | 0.1760           | NS                    |
|                                  |                                             |                                                   | Chd3                             | FBgn0023395                  | Chromatin assembly or disassembly, nucleosome remodelling                             | 0.0027           | **                    |
| GOTERM_MF/BP_DIRECT              | Nucleosome mobilisation, nucleosome binding | 1.76                                              | dre4                             | FBgn0002183                  | Chromatin binding, nucleosome binding                                                 | 0.0021           | **                    |
|                                  |                                             |                                                   | E(bx)                            | FBgn0000541                  | Histone binding, chromatin organisation, chromatin remodelling                        | 0.0809           | .                     |
|                                  |                                             |                                                   | Su(z)12                          | FBgn0020887                  | Polycomb repressive complex 2, histone methyltransferase activity'                    | 0.0391           | *                     |
| INTERPRO                         | WD40 repeat                                 | 1.67                                              | Hira                             | FBgn0022786                  | Chromatin binding                                                                     | 0.0000           | ***                   |
|                                  |                                             |                                                   | Caf1-105                         | FBgn0033526                  | Chromatin assembly factor, histone binding                                            | 0.0001           | ***                   |
|                                  |                                             |                                                   | wds                              | FBgn0040066                  | Histone acetyltransferase activity, chromatin remodelling, Trx complex                | 0.0032           | **                    |
|                                  |                                             |                                                   | ebi                              | FBgn0263933                  | Chromatin binding                                                                     | 0.0070           | **                    |
| GOTERM_BP/CC_DIRECT              | Histone phosphorylation                     | 1.6                                               | borr                             | FBgn0032105                  | Histone phosphorylation, chromatin binding                                            | 0.0006           | ***                   |
|                                  |                                             |                                                   | ball                             | FBgn0027889                  | Histone threonine kinase activity, histone phosphorylation                            | 0.0009           | ***                   |
|                                  |                                             |                                                   | aurB                             | FBgn0024227                  | Chromatin organisation                                                                | 0.0004           | ***                   |

bioRxiv preprint doi: <https://doi.org/10.1101/152330>; this version posted June 20, 2017. The copyright holder for this preprint (which was not certified by peer review) is the author/funder. All rights reserved. No reuse allowed without permission.



| Annotation Category                         | Term                                                                 | Enrichment score                                                            | Gene                              | FlyBase Gene ID       | Function                                                                  | p-value of ANOVA | Significance of ANOVA |
|---------------------------------------------|----------------------------------------------------------------------|-----------------------------------------------------------------------------|-----------------------------------|-----------------------|---------------------------------------------------------------------------|------------------|-----------------------|
| INTERPRO                                    | Immunoglobulin-like domain/fold                                      | 11.42                                                                       | mesh                              | FBgn0051004           | Ig fold                                                                   | 0.000611         | ***                   |
|                                             |                                                                      |                                                                             | Ppn                               | FBgn0003137           | Ig domain, extracellular matrix structural constituent                    | 0.0101           | *                     |
|                                             |                                                                      |                                                                             | Jon65Ai                           | FBgn0035667           | Serine-type endopeptidase, proteolysis                                    | 0.00293          | **                    |
|                                             |                                                                      |                                                                             | MP1                               | FBgn0027930           | Serine-type endopeptidase, proteolysis                                    | 0.00187          | **                    |
|                                             |                                                                      |                                                                             | thetaTry                          | FBgn0011555           | Digestive enzyme with serine-type peptidase activity                      | 1.68E-08         | ***                   |
|                                             |                                                                      |                                                                             | zetaTry                           | FBgn0011556           | Digestive enzyme with serine-type peptidase activity                      | 0.000488         | ***                   |
|                                             |                                                                      |                                                                             | Decay                             | FBgn0028381           | Cysteine-type endopeptidase activity, caspase                             | 0.00188          | **                    |
|                                             |                                                                      |                                                                             | Damm                              | FBgn0033659           | Cysteine-type endopeptidase activity, caspase                             | 6.79E-06         | ***                   |
|                                             |                                                                      |                                                                             | alphaTry                          | FBgn0003863           | Serine-type endopeptidase, proteolysis                                    | 5.69E-05         | ***                   |
|                                             |                                                                      |                                                                             | Ser7                              | FBgn0019929           | Serine-type endopeptidase, proteolysis                                    | 1.51E-12         | ***                   |
|                                             |                                                                      |                                                                             | Ser6                              | FBgn0011834           | Serine-type endopeptidase, proteolysis                                    | 5.17E-03         | **                    |
|                                             |                                                                      |                                                                             | Swim                              | FBgn0034709           | Polysaccharide binding, cysteine-type peptidase activity, proteolysis     | 1.35E-02         | *                     |
|                                             |                                                                      |                                                                             | Jon74E                            | FBgn0023197           | Serine-type endopeptidase, proteolysis                                    | 1.58E-03         | **                    |
|                                             |                                                                      |                                                                             | psh                               | FBgn0030926           | Peptidase and serine-type endopeptidase activity, defense response        | 4.41E-08         | ***                   |
| INTERPRO/GO_TERM_BP_DIRECT/GOTERM_MF_DIRECT | Proteolysis, peptidase                                               | 6.16                                                                        | Jon65Aiv                          | FBgn0250815           | Serine-type endopeptidase, proteolysis                                    | 1.74E-04         | ***                   |
|                                             |                                                                      |                                                                             | Jon65Aiii                         | FBgn0035665           | Serine-type endopeptidase, proteolysis                                    | 6.77E-05         | ***                   |
|                                             |                                                                      |                                                                             | Ance-4                            | FBgn0033366           | Peptidase                                                                 | 6.97E-04         | ***                   |
|                                             |                                                                      |                                                                             | Ance                              | FBgn0012037           | peptidyl-dipeptidase activity                                             | 6.97E-04         | ***                   |
|                                             |                                                                      |                                                                             | Jon25Bii                          | FBgn0031654           | Serine-type endopeptidase, proteolysis                                    | 8.62E-04         | ***                   |
|                                             |                                                                      |                                                                             | Rh3                               | FBgn0003249           | G-protein coupled photoreceptor activity                                  | 3.73E-03         | **                    |
|                                             |                                                                      |                                                                             | AkhR                              | FBgn0025595           | Ccarbohydrate, lipid and tryglyceride homeostasis                         | 1.88E-09         | ***                   |
|                                             |                                                                      |                                                                             | Rh2                               | FBgn0003248           | G-protein coupled photoreceptor activity                                  | 4.65E-02         | *                     |
|                                             |                                                                      |                                                                             | Galphas                           | FBgn0001123           | Signal transduction, chemical synaptic transmission                       | 1.07E-11         | ***                   |
|                                             |                                                                      |                                                                             | ninaE                             | FBgn0002940           | G-protein coupled photoreceptor activity, rhodopsin-like                  | 2.80E-05         | ***                   |
|                                             |                                                                      |                                                                             | Ggamma1                           | FBgn0004921           | G-protein, gamma subunit, signal transducer activity                      | 4.16E-05         | ***                   |
|                                             |                                                                      |                                                                             | Gbeta76C                          | FBgn0004623           | G-protein coupled photoreceptor activity                                  | 2.71E-02         | *                     |
|                                             |                                                                      |                                                                             | Rh4                               | FBgn0003250           | G-protein coupled photoreceptor activity                                  | 1.83E-03         | **                    |
|                                             |                                                                      |                                                                             | GOTERM_MF_DIRECT/GOTERM_BP_DIRECT | Fatty acid elongation | 3.49                                                                      | eloF             | FBgn0037762           |
| Nplp2                                       | FBgn0040813                                                          | Neuropeptide signaling, humoral immune response                             |                                   |                       |                                                                           | 1.39E-02         | *                     |
| GOTERM_MF_DIRECT                            | Neuropeptide hormone activity/binding                                | 3.35                                                                        | Nplp3                             | FBgn0042201           | Neuropeptide hormone activity, neuropeptide signaling                     | 3.45E-01         | NS                    |
|                                             |                                                                      |                                                                             | Neb-cGP                           | FBgn0083167           | Hormone activity, regulation of growth                                    | 3.72E-02         | *                     |
| GOTERM_MF/CC/BP_DIRECT                      | Calcium-dependent phospholipid binding                               | 2.72                                                                        | AnxB9                             | FBgn0000083           | calcium ion binding, calcium-dependent phospholipid binding               | 7.69E-03         | **                    |
| GPTERM_MP_DIRECT, INTERPRO, COG_ONTOLOGY    | Calcium ion binding, signal transduction, EF-hand domain             | 2.5                                                                         | Cals                              | FBgn0039928           | Calcium ion binding, chemical synaptic transmission                       | 2.29E-02         | *                     |
|                                             |                                                                      |                                                                             | Gel                               | FBgn0010225           | Actin binding, calcium ion binding                                        | 1.52E-03         | **                    |
|                                             |                                                                      |                                                                             | Scp2                              | FBgn0020907           | Calcium ion binding                                                       | 3.43E-02         | *                     |
|                                             |                                                                      |                                                                             | Scp1                              | FBgn0020908           | Calcium ion binding                                                       | 8.74E-02         | .                     |
|                                             |                                                                      |                                                                             | Mlc2                              | FBgn0002773           | Calcium ion binding                                                       | 3.33E-04         | ***                   |
|                                             |                                                                      |                                                                             | Zasp52                            | FBgn0265991           | Muscle development                                                        | 3.91E-08         | ***                   |
|                                             |                                                                      |                                                                             | LpR1                              | FBgn0066101           | Uptake of neutral lipids from circulation, calcium ion binding            | 4.93E-01         | NS                    |
|                                             |                                                                      |                                                                             | Mlc1                              | FBgn0002772           | Calcium ion binding, myosin                                               | 3.91E-04         | ***                   |
|                                             |                                                                      |                                                                             | up                                | FBgn0004169           | Calcium ion binding, calcium ion homeostasis, muscle morphogenesis        | 3.26E-04         | ***                   |
|                                             |                                                                      |                                                                             | TpnC73F                           | FBgn0010424           | Calcium ion binding                                                       | 3.01E-10         | ***                   |
|                                             |                                                                      |                                                                             | Gpo-1                             | FBgn0022160           | Glycerol-3-phosphate dehydrogenase activity, calcium ion binding          | 0.000209         | ***                   |
| INTERPRO, GOTERM_MF/BP/CC_DIRECT            | Fatty acyl-CoA reductase, peroxisome                                 | 2.47                                                                        | wat                               | FBgn0039620           | Long-chain-fatty-acyl-CoA reductase activity, oxidation-reduction process | 1.21E-06         | ***                   |
|                                             |                                                                      |                                                                             | Spat                              | FBgn0014031           | Amino transferase activity, glyoxylate catabolic process, proxisome       | 2.02E-02         | *                     |
|                                             |                                                                      |                                                                             | Cat                               | FBgn0000261           | Catalase, antioxidant activity and ROS metabolic process                  | 1.15E-02         | *                     |
|                                             |                                                                      |                                                                             | Uro                               | FBgn0003961           | Urate oxidase activity, oxidation-reduction process, peroxisome           | 1.96E-02         | *                     |
|                                             |                                                                      |                                                                             | Acox57D-d                         | FBgn0034629           | acyl-CoA dehydrogenase activity, fatty acid beta-oxidation, peroxisome    | 4.63E-05         | ***                   |
| GOTERM_MF/BP/CC_DIRECT, INTERPRO            | Oxidation-reduction, heme binding, iron ion binding, Cytochrome P450 | 2.2                                                                         | Men                               | FBgn0002719           | Malic oxidoreductase, determination of adult lifespan                     | 5.16E-04         | ***                   |
|                                             |                                                                      |                                                                             | Cyp6a23                           | FBgn0033978           | Cytochrome P450, heme and iron ion binding, oxidation-reduction process   | 4.93E-01         | NS                    |
|                                             |                                                                      |                                                                             | Cyp4p1                            | FBgn0015037           | Cytochrome P450, heme and iron ion binding, oxidation-reduction process   | 7.98E-02         | .                     |
|                                             |                                                                      |                                                                             | Cpr                               | FBgn0015623           | NADPH-hemoprotein reductase activity, oxidation-reduction process         | 2.27E-04         | ***                   |
|                                             |                                                                      |                                                                             | Cyt-b5-r                          | FBgn0000406           | Heme binding, oxidoreductase activity, lipid metabolic process            | 2.69E-04         | ***                   |
|                                             |                                                                      |                                                                             | antdh                             | FBgn0026268           | Oxidoreductase activity, oxidation-reduction process                      | 4.85E-02         | *                     |
|                                             |                                                                      |                                                                             | AOX1                              | FBgn0267408           | Aldehyde oxidase, pyridoxal oxidase activity                              | 5.82E-03         | **                    |
|                                             |                                                                      |                                                                             | Cyt-b5                            | FBgn0264294           | Cytocrome b5-like heme-binding site                                       | 6.47E-04         | ***                   |
|                                             |                                                                      |                                                                             | Cyp313a1                          | FBgn0038236           | Cytochrome P450, heme and iron ion binding, oxidation-reduction process   | 1.45E-02         | *                     |
|                                             |                                                                      |                                                                             | mt:Col                            | FBgn0013674           | Mitochondrial Cytochrome C oxidase, heme and iron binding                 | 7.39E-02         | .                     |
|                                             |                                                                      |                                                                             | Aldh                              | FBgn0012036           | Aldehyde dehydrogenase, oxidation-reduction                               | 9.39E-03         | **                    |
|                                             |                                                                      |                                                                             | Cyp4e3                            | FBgn0015035           | Cytochrome P450, heme and iron ion binding, oxidation-reduction process   | 1.27E-05         | ***                   |
|                                             |                                                                      |                                                                             | hgo                               | FBgn0040211           | Homogentisate 1,2-dioxygenase activity, oxidation-reduction process       | 4.08E-03         | **                    |
|                                             |                                                                      |                                                                             | Pdh                               | FBgn0011693           | Retinol and alcohol dehydrogenase activity, oxidation-reduction process   | 4.75E-03         | **                    |
| Desat1                                      | FBgn0086687                                                          | Fatty acid desaturase, oxidation-reduction process                          | 2.55E-05                          | ***                   |                                                                           |                  |                       |
| Plod                                        | FBgn0036147                                                          | Iron ion binding, oxidoreductase activity, oxidation-reduction process      | 6.75E-04                          | ***                   |                                                                           |                  |                       |
| Fad2                                        | FBgn0029172                                                          | Fatty acid desaturase, oxidation-reduction process, lipid metabolic process | 1.15E-03                          | **                    |                                                                           |                  |                       |

bioRxiv preprint doi: <https://doi.org/10.1101/152330>; this version posted June 20, 2017. The copyright holder for this preprint (which was not certified by peer review) is the author/funder. All rights reserved. No reuse allowed without permission.

|                                                |                                                                     |      |             |             |                                                                               |              |
|------------------------------------------------|---------------------------------------------------------------------|------|-------------|-------------|-------------------------------------------------------------------------------|--------------|
|                                                |                                                                     |      | Gpdh        | FBgn0001128 | Carbohydrate metabolic process, oxidation-reduction process                   | 6.13E-04 *** |
| GOTERM_BP/CC/MF_DIRECT                         | Calcium ion channel, transmembrane transport                        | 2.13 | trpl        | FBgn0005614 | Calcium channel activity, calcium ion transport                               | 2.13E-02 *   |
|                                                |                                                                     |      | trp         | FBgn0003861 | Plasma membrane cation channel, calcium channel                               | 3.06E-09 *** |
| GOTERM_BP/CC/MF_DIRECT                         | Voltage-gated potassium channel activity                            | 2.03 | Irk3        | FBgn0032706 | Potassium channel activity, potassium ion transport                           | 3.88E-02 *   |
|                                                |                                                                     |      | ACC         | FBgn0033246 | Acetyl-CoA carboxylase activity, fatty acid biosynthetic process              | 3.44E-03 **  |
|                                                |                                                                     |      | Cyt-b5-r    | FBgn0000406 | Cytochrome b5-like heme binding, lipid metabolic process                      | 6.47E-04 *** |
| KEGG_PATHWAY, INTERPRO, GOTERM_BP/CC/MF_DIRECT | Fatty acid metabolism/biosynthetic process                          | 1.93 | Desat1      | FBgn0086687 | Fatty acid desaturase, oxidation-reduction process                            | 2.55E-05 *** |
|                                                |                                                                     |      | Fad2        | FBgn0029172 | Fatty acid desaturase, oxidation-reduction process, lipid metabolic process   | 1.15E-03 **  |
|                                                |                                                                     |      | Acsl        | FBgn0263120 | Long-chain fatty acid-CoA ligase activity                                     | 1.03E-04 *** |
| INTERPRO, GOTERM_MF_DIRECT                     | Carbohydrate binding                                                | 1.91 | Clect27     | FBgn0031629 | Carbohydrate binding                                                          | 4.40E-11 *** |
|                                                |                                                                     |      | lectin-37Db | FBgn0053533 | Galactose binding                                                             | 2.68E-04 *** |
| INTERPRO, GOTERM_MF_DIRECT                     | Potassium ion transport, oxalate transmembrane transporter activity | 1.65 | Irk3        | FBgn0032706 | Potassium channel activity, potassium ion transport                           | 3.88E-02 *   |
|                                                |                                                                     |      | Irk2        | FBgn0039081 | Potassium channel activity, potassium ion transport                           | 1.96E-08 *** |
|                                                |                                                                     |      | Dic1        | FBgn0027610 | Inorganic phosphate transmembrane transporter activity                        | 3.33E-05 *** |
| GOTERM_MF/BP/CC_DIRECT, INTERPRO               | Neurotransmitter-gated ion-channel ligand binding                   | 1.45 | Cals        | FBgn0039928 | Calcium ion binding                                                           | 2.29E-02 *   |
|                                                |                                                                     |      | alpha-Est7  | FBgn0015575 | Carboxylic ester hydrolase activity, lipid storage, determination of lifespan | 2.49E-04 *** |
|                                                |                                                                     |      | ACC         | FBgn0033246 | Acetyl-CoA carboxylase activity, fatty acid biosynthetic process              | 3.44E-03 **  |
| GOTERM_MF/BP/CC_DIRECT, INTERPRO, COG_ONTOLOGY | Receptor activity, carboxylesterase, lipid metabolism               | 1.35 | Gs2         | FBgn0001145 | Glutamate catabolic process, neurotransmitter receptor metabolic process      | 1.46E-03 **  |
|                                                |                                                                     |      | Est-6       | FBgn0000592 | Carboxylic ester hydrolase activity                                           | 2.93E-02 *   |
|                                                |                                                                     |      | AcCoAS      | FBgn0012034 | Acetyl-CoA ligase activity                                                    | 3.35E-04 *** |
| GOTERM_MF/BP/CC_DIRECT, INTERPRO               | Neurotransmitter transporter                                        | 1.32 | NAAT1       | FBgn0029762 | Neurotransmitter transporter activity                                         | 2.06E-08 *** |
|                                                |                                                                     |      | Eaat1       | FBgn0026439 | Glutamate:sodium symporter activity, determination of adult lifespan          | 2.06E-02 *   |

bioRxiv preprint doi: <https://doi.org/10.1101/152380>; this version posted June 20, 2017. The copyright holder for this preprint (which was not certified by peer review) is the author/funder. All rights reserved. No reuse allowed without permission.
